# Supplementary material for: Proteomic and Single-Cell Transcriptomic Dissection of Human Plasmacytoid Dendritic Cell Response to Influenza Virus
Source: PubMed Central journal article supplement (PMC8984281; doi:10.3389/fimmu.2022.814627), 2022-03-23
Supplement: DataSheet_1.pdf [file DataSheet_1.pdf]

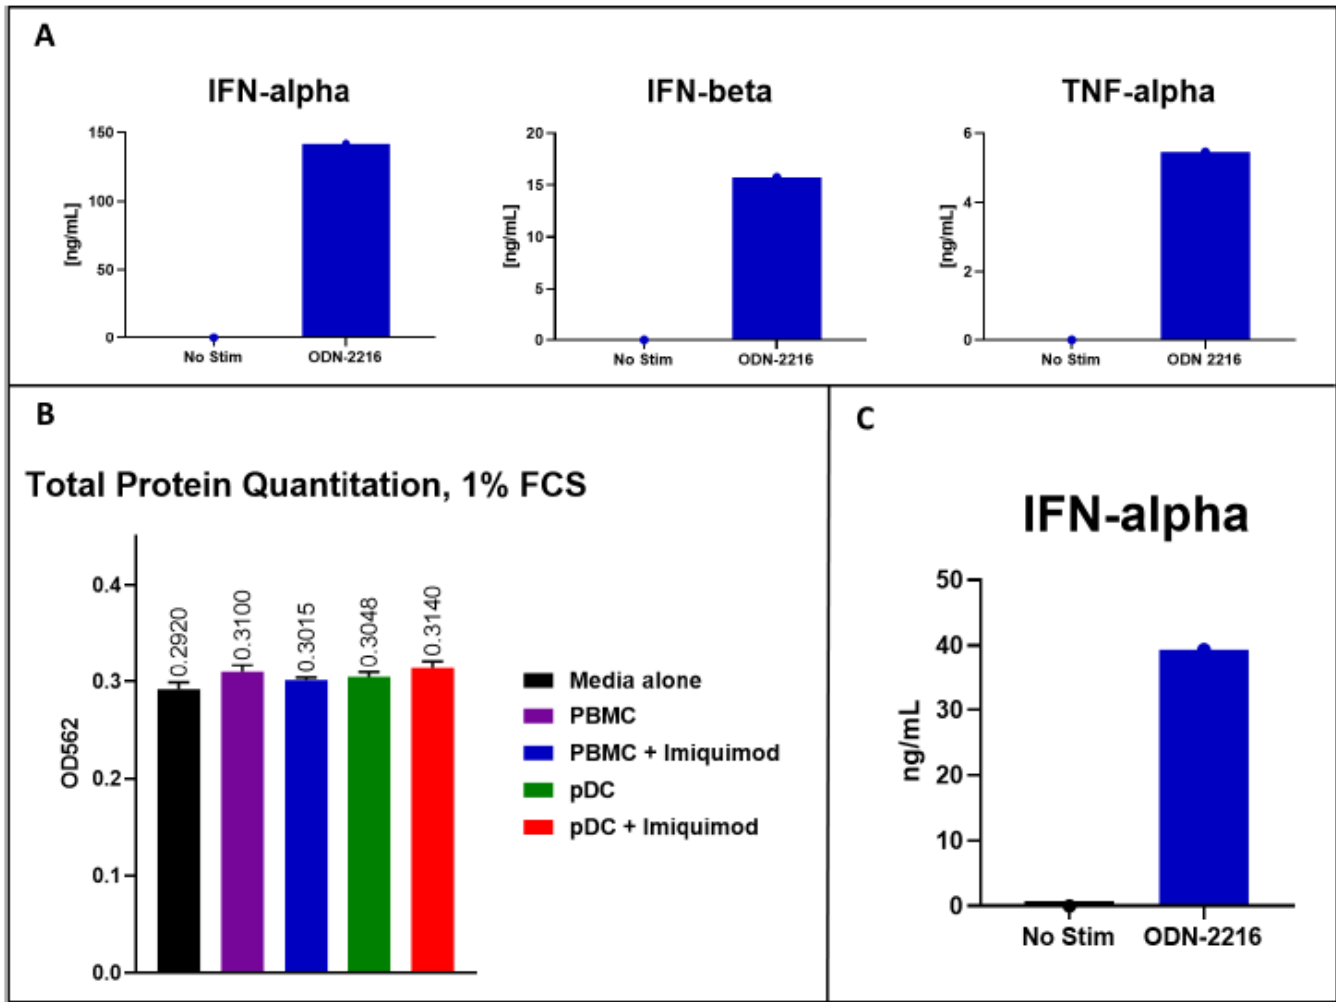

Figure S1: Media optimization towards LC-MS/MS.

A) pDCs cultured in the presence of 1% FCS are highly responsive to stimulation, producing robust amounts of IFN-alpha, IFN-beta and TNF-alpha. B) BCA assay for total protein content. Despite substantial cytokine production, pDCs only marginally enrich the protein content of the culture media, as >90% of media protein is derived from FCS alone. Stimulated pDCs were no different in this regard than unstimulated pDCs or PBMCs. C) pDCs cultured in Advanced RPMI, containing minimal amounts of albumin, insulin and holo-transferrin, without any serum supplement, remain highly functional. ODN2216, TLR9 agonist. Imiquimod, TLR7 agonist.

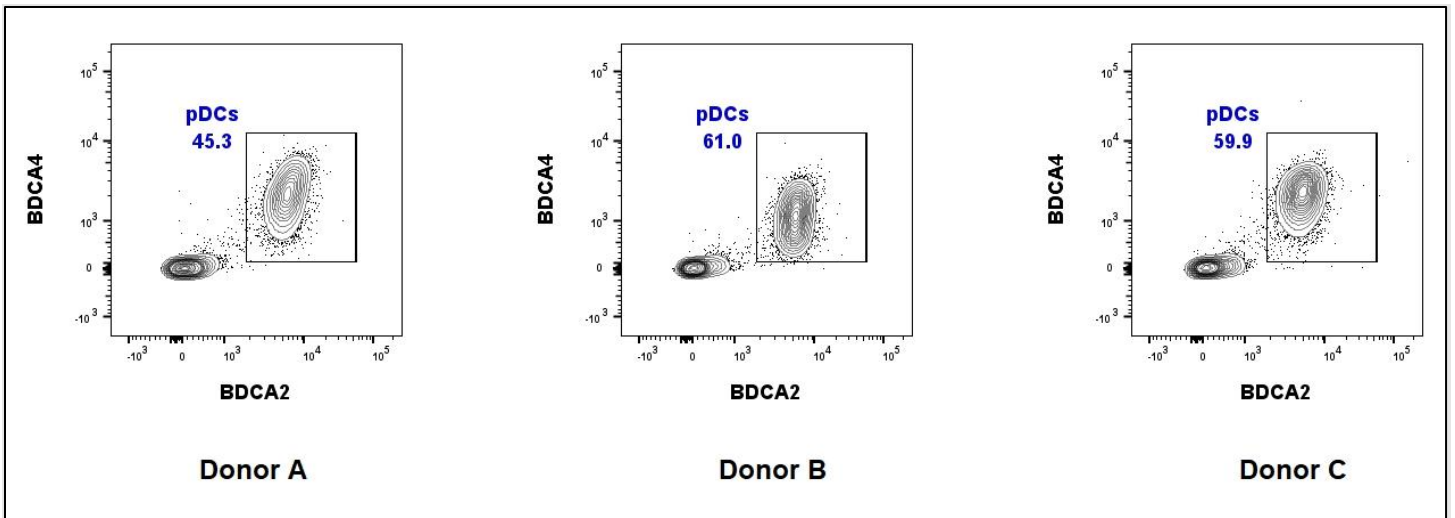

Figure S2: pDC purity for the secretome cultures.

pDCs were enriched from 3 donors emphasizing yield over purity. Purity was determined by staining for BDCA2 and BDCA4. Cell yields were: Donor A,  $4.2 \times 10^6$ ; Donor B  $3.7 \times 10^6$ , Donor C  $1.5 \times 10^6$  total cells. Cell viability was >95% by fluorescent cell counting using Acridine Orange / Propidium Iodide staining and the Cellometer Auto 2000 instrument. Pre-enrichment pDC frequency was 0.2-0.3% among PBMCs in all donors.

A

Sample Protein Content

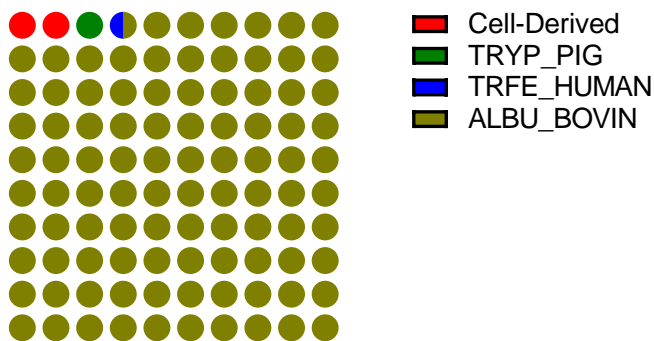

B

No Stim

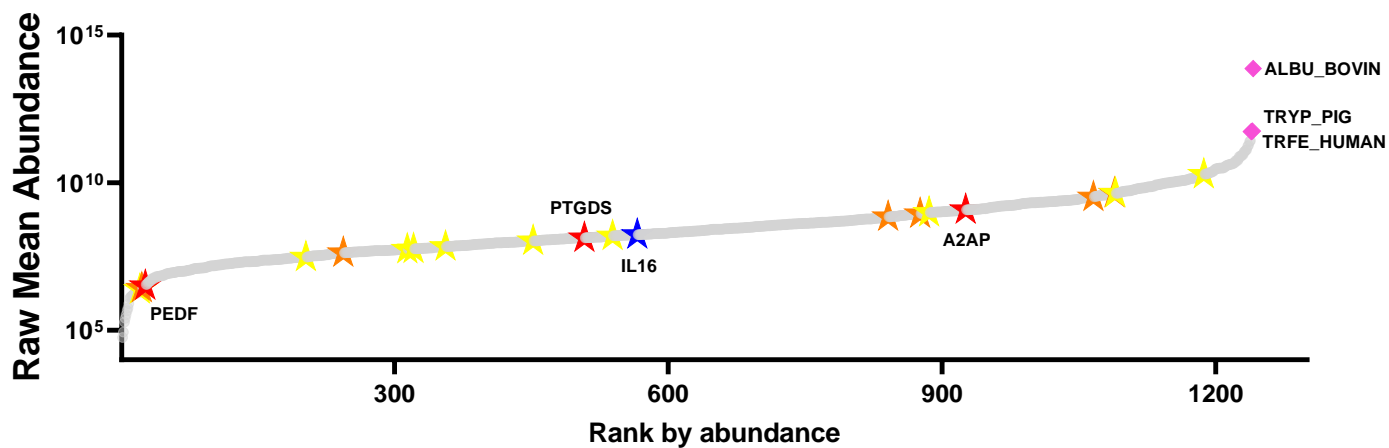

C

Flu virus

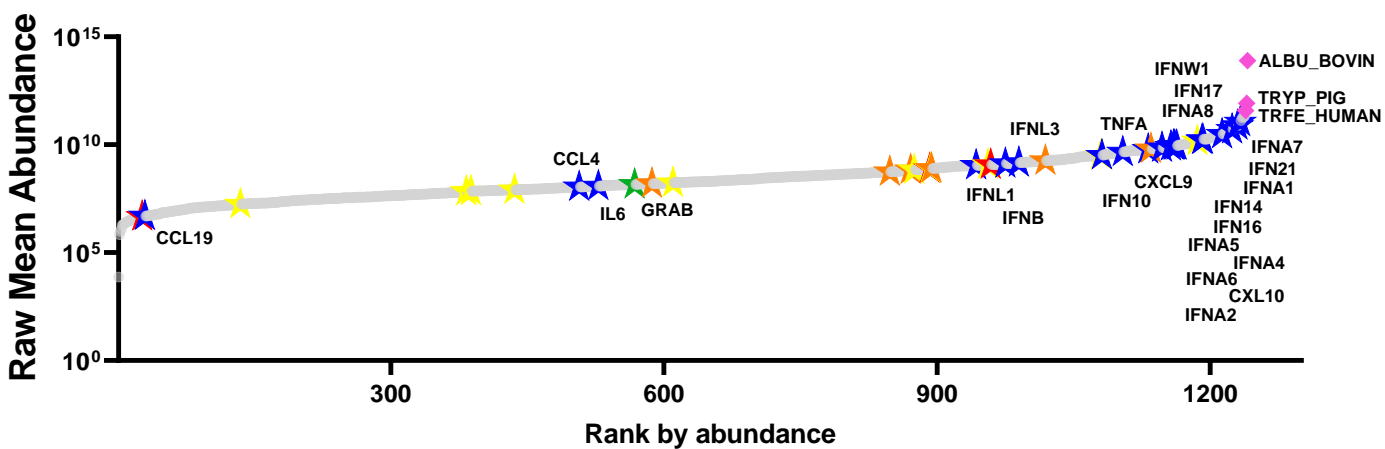

Figure S3. The pDC baseline and influenza-induced secretomes.

A) Protein content in the samples by relative abundance. B) Proteins identified in the unstimulated group ranked by average abundance. C) Proteins identified in the Influenza H1N1-stimulated group ranked by average abundance. For B and C: Data points represent unique proteins. Pink diamonds; exogenous proteins. Yellow, orange, red stars: proteins annotated as 'secreted' in the UniProt database, with relative enrichment of expression in pDCs among circulating leukocytes according to the Protein Atlas (<http://www.proteinatlas.org/>), with yellow=mild, orange=moderate, and red=significant pDC enrichment. Blue stars; cytokines/chemokines. Green star; granzyme B. Gray data points, with all points fused into a single line, represent proteins not annotated as 'secreted' in UniProt or not significantly enriched for expression in pDCs according to the Protein Atlas. Select proteins of interest are directly labeled.

**A**

**HEMO\_HUMAN, Hemopexin**

Example Peptide Abundances

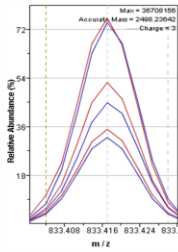

EVGTPHGIILSDVDAAFIC[160.0307]PGSSR (3+)

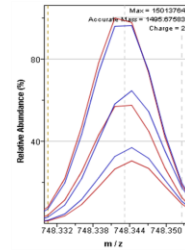

YYC[160.0307]FQGNQFLR (2+)

| Peptide Count | Mean Ion Score | Mean Protein Score | Ratio (Flu stim/ NO STIM) | P-value (Flu stim vs. NO STIM) |
|---------------|----------------|--------------------|---------------------------|--------------------------------|
| 20            | 57             | 1,133              | 0.99                      | 0.89                           |

**HEMO\_HUMAN, Hemopexin**

Example MS/MS Spectra

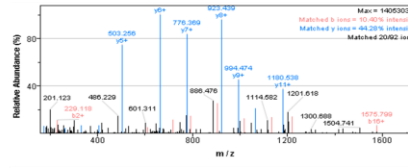

EVGTPHGIILSDVDAAFIC[160.0307]PGSSR (3+)

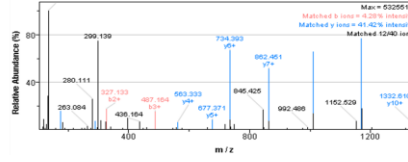

YYC[160.0307]FQGNQFLR (2+)

**B**

**DPYL2\_HUMAN, Dihydropyrimidinase-related protein 2**

Example Peptide Abundances

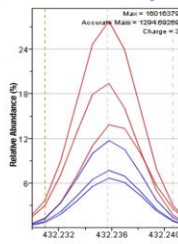

MVIPIGGIDVHTR (3+)

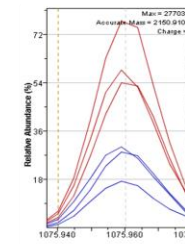

FQMPDQGMSADDFFQGTK (2+)

| Peptide Count | Mean Ion Score | Mean Protein Score | Ratio (Flu stim/ NO STIM) | P-value (Flu stim vs. NO STIM) |
|---------------|----------------|--------------------|---------------------------|--------------------------------|
| 21            | 61             | 1,065              | 0.46                      | 3.4E-27                        |

**DPYL2\_HUMAN, Dihydropyrimidinase-related protein 2**

Example MS/MS Spectra

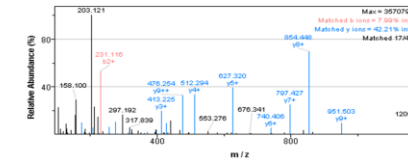

MVIPIGGIDVHTR (3+)

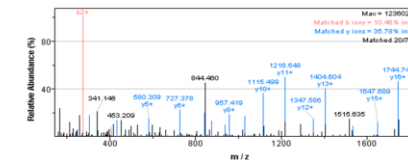

FQMPDQGMSADDFFQGTK (2+)

**C**

**TNFA\_HUMAN, Tumor necrosis factor**

Example Peptide Abundances

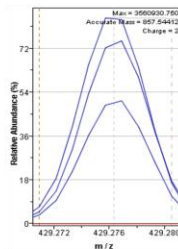

VNLLSAIK (2+)

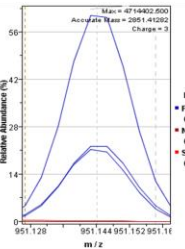

ETPEGAEAKPWYEIPLGGVFQLEK (3+)

| Peptide Count | Mean Ion Score | Mean Protein Score | Ratio (Flu stim/ NO STIM) | P-value (Flu stim vs. NO STIM) |
|---------------|----------------|--------------------|---------------------------|--------------------------------|
| 5             | 38             | 137                | 72.1                      | 3.5E-17                        |

**TNFA\_HUMAN, Tumor necrosis factor**

Example MS/MS Spectra

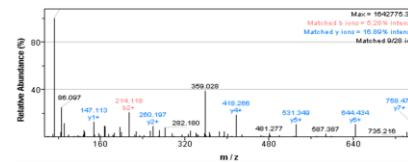

VNLLSAIK (2+)

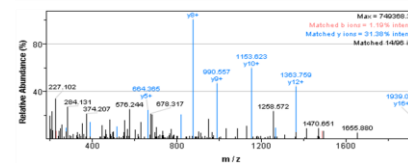

ETPEGAEAKPWYEIPLGGVFQLEK (3+)

**D**

**IFN21\_HUMAN, Interferon alpha-21**

Example Peptide Abundances

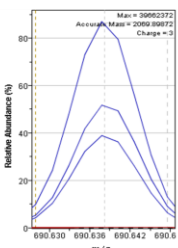

HDFGFPQEEFDGNQFQK (3+)

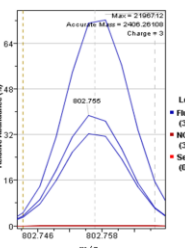

AQAISVLHEMIQQTFLNLFSTK (3+)

| Peptide Count | Mean Ion Score | Mean Protein Score | Ratio (Flu stim/ NO STIM) | P-value (Flu stim vs. NO STIM) |
|---------------|----------------|--------------------|---------------------------|--------------------------------|
| 7             | 64             | 1,432              | 468                       | 2.0E-21                        |

**IFN21\_HUMAN, Interferon alpha-21**

Example MS/MS Spectra

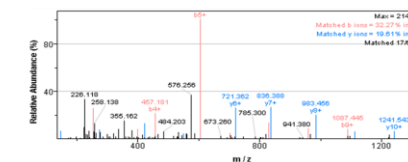

HDFGFPQEEFDGNQFQK (3+)

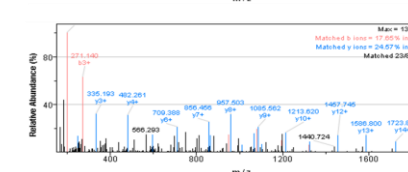

AQAISVLHEMIQQTFLNLFSTK (3+)

Figure S4. Representative protein species identified in the baseline and induced pDC secretomes.

For each protein, example graphics for two peptides are shown, including a monoisotopic MS peak (feature plotted as relative % abundance) as generated by the Elucidator program (charge state indicated), and an ms/ms spectrum for each peptide. Blue peaks are y-ions, red peaks are b-ions, and black are unmatched peaks. The feature peaks (left) in each case are an overlay of aligned monoisotopic peaks of MS spectra for the 12 LC-MS/MS runs in the experiment. Below the MS feature graphics is a table representing quantitation and identification details for each protein. A. Hemopexin, a protein produced by the liver and not known to be produced by circulating leukocytes, is not significantly different in preparations from unstimulated and flu stimulated cells. B. DPYL2, a metabolic enzyme, is enriched in the media of unstimulated cells compared to flu stimulated cells. C-D. Interferon  $\alpha$ -1/13 and TNF- $\alpha$  are tremendously upregulated in the flu stimulated condition.

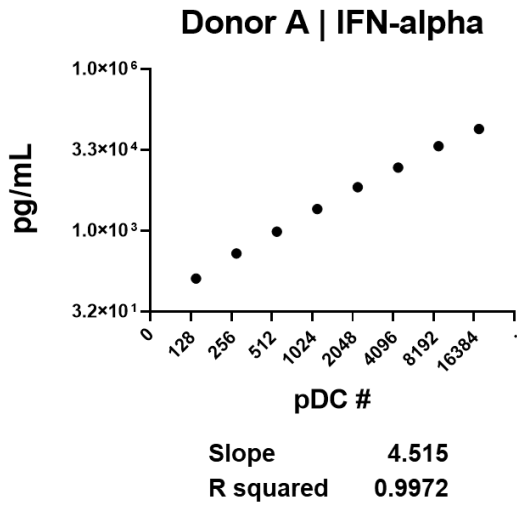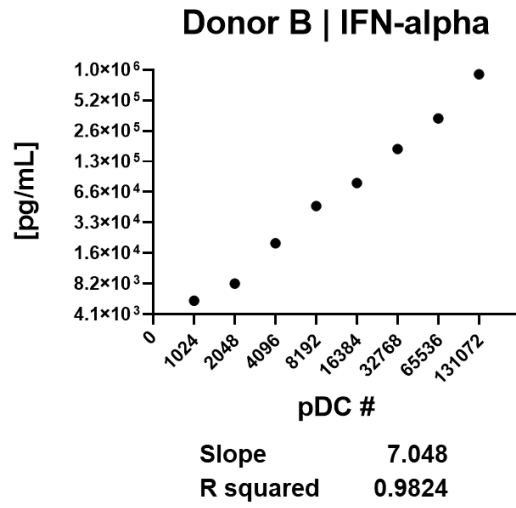

Figure S5. Relationship between pDC input in IFN- $\alpha$  output using influenza H1N1 as the stimulus.

Data derived from pDCs cultured for 24hrs in 96-well plates, with cells in a fixed 200uL culture volume per well. IFN-alpha levels determined using pan-subtype ELISA.



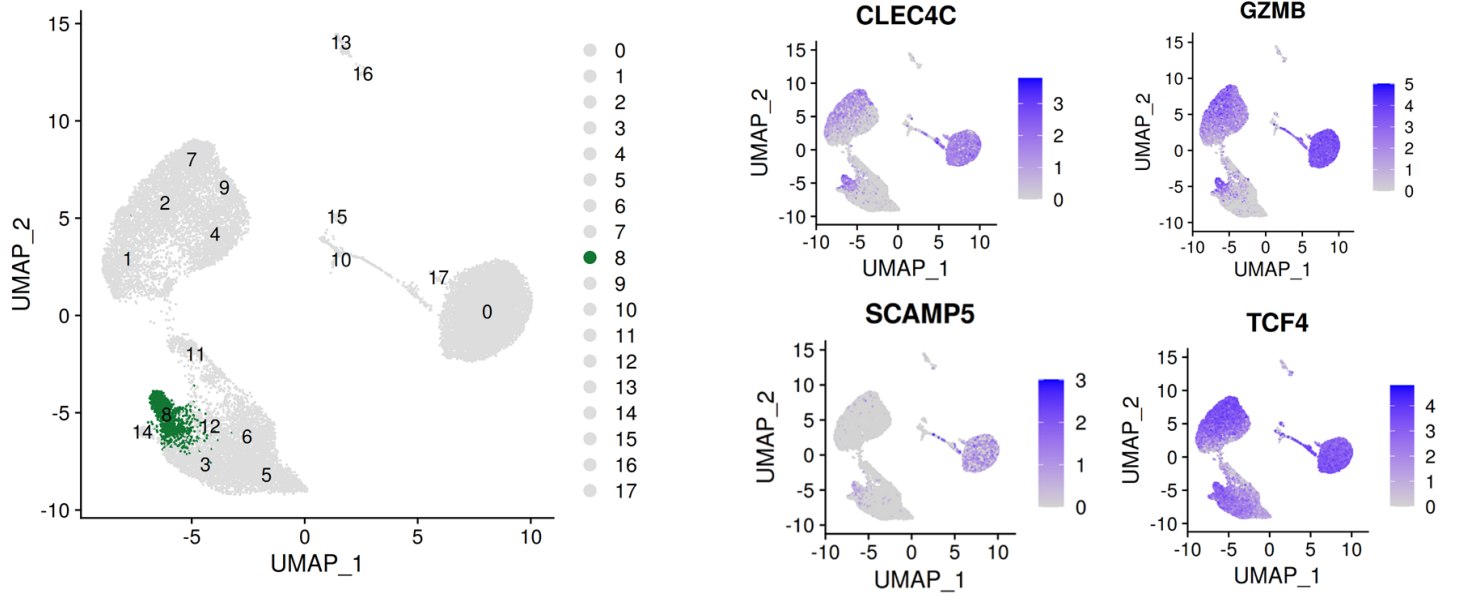

Figure S6. Cluster 8 retains features of unperturbed pDCs to 24hrs in the presence of influenza virus.

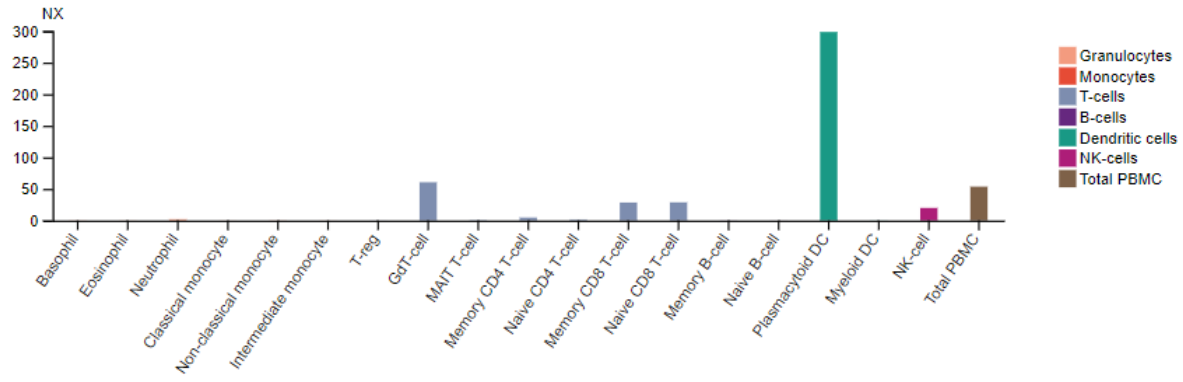

Figure S7. Expression of Granzyme B across leukocyte subsets in the Human Protein Atlas.

Table S1 LC-MS/MS Identified Proteins in the pDC Secretome with normalized expression data.

| UniProt ID   | Peptide Count | Ratio (Flu stim:NO STIM) | P-value (Flu stim vs. NO STIM) | -LOG(P)        |
|--------------|---------------|--------------------------|--------------------------------|----------------|
| <b>IFN10</b> | <b>2</b>      | <b>306</b>               | <b>0</b>                       | <b>&gt;40</b>  |
| <b>IFN17</b> | <b>2</b>      | <b>91.6</b>              | <b>0</b>                       | <b>&gt;40</b>  |
| <b>IFNW1</b> | <b>3</b>      | <b>44.2</b>              | <b>0</b>                       | <b>&gt;40</b>  |
| <b>IFNA8</b> | <b>4</b>      | <b>901</b>               | <b>0</b>                       | <b>&gt;40</b>  |
| <b>IFNA7</b> | <b>10</b>     | <b>470</b>               | <b>0</b>                       | <b>&gt;40</b>  |
| <b>IFNB</b>  | <b>3</b>      | <b>647</b>               | <b>3.6E-40</b>                 | <b>39.4432</b> |
| <b>IFN14</b> | <b>4</b>      | <b>508</b>               | <b>1.0E-33</b>                 | <b>33.0001</b> |
| <b>IFNA4</b> | <b>4</b>      | <b>550</b>               | <b>2.3E-30</b>                 | <b>29.6356</b> |
| <b>IFNA6</b> | <b>5</b>      | <b>234</b>               | <b>1.1E-28</b>                 | <b>27.9531</b> |
| <b>IFN16</b> | <b>6</b>      | <b>94.9</b>              | <b>3.1E-28</b>                 | <b>27.5147</b> |
| <b>DPYL2</b> | <b>21</b>     | <b>0.46</b>              | <b>3.4E-27</b>                 | <b>26.472</b>  |
| <b>IFNA5</b> | <b>2</b>      | <b>56.1</b>              | <b>1.3E-25</b>                 | <b>24.8755</b> |
| <b>PNCB</b>  | <b>4</b>      | <b>0.36</b>              | <b>9.5E-25</b>                 | <b>24.0244</b> |
| <b>IFNL3</b> | <b>2</b>      | <b>186</b>               | <b>2.0E-23</b>                 | <b>22.71</b>   |
| <b>IFN21</b> | <b>7</b>      | <b>468</b>               | <b>2.0E-21</b>                 | <b>20.6942</b> |
| <b>IFNA2</b> | <b>4</b>      | <b>296</b>               | <b>2.2E-18</b>                 | <b>17.6657</b> |
| <b>TNFA</b>  | <b>5</b>      | <b>72.1</b>              | <b>3.5E-17</b>                 | <b>16.4548</b> |
| <b>CALU</b>  | <b>1</b>      | <b>8.21</b>              | <b>1.1E-16</b>                 | <b>15.9626</b> |
| <b>IFNA1</b> | <b>10</b>     | <b>499</b>               | <b>4.6E-16</b>                 | <b>15.3368</b> |
| <b>H2AY</b>  | <b>12</b>     | <b>0.44</b>              | <b>2.6E-13</b>                 | <b>12.5894</b> |
| <b>CCL4</b>  | <b>1</b>      | <b>6.85</b>              | <b>6.5E-13</b>                 | <b>12.1896</b> |
| <b>COR1B</b> | <b>5</b>      | <b>0.43</b>              | <b>3.4E-12</b>                 | <b>11.4641</b> |
| <b>H1X</b>   | <b>5</b>      | <b>0.28</b>              | <b>1.4E-10</b>                 | <b>9.86614</b> |
| <b>LGMN</b>  | <b>4</b>      | <b>11.0</b>              | <b>1.8E-10</b>                 | <b>9.7428</b>  |
| <b>PDCD4</b> | <b>2</b>      | <b>0.14</b>              | <b>5.3E-10</b>                 | <b>9.27597</b> |
| <b>TCL1A</b> | <b>2</b>      | <b>0.49</b>              | <b>8.8E-10</b>                 | <b>9.05453</b> |
| <b>GLO2</b>  | <b>2</b>      | <b>0.35</b>              | <b>4.4E-09</b>                 | <b>8.36002</b> |
| <b>IFIT3</b> | <b>7</b>      | <b>40.5</b>              | <b>8.1E-09</b>                 | <b>8.09334</b> |
| <b>HP1B3</b> | <b>2</b>      | <b>0.24</b>              | <b>1.1E-08</b>                 | <b>7.96098</b> |
| <b>RHG17</b> | <b>6</b>      | <b>0.48</b>              | <b>5.2E-08</b>                 | <b>7.28802</b> |
| <b>COR1C</b> | <b>17</b>     | <b>0.39</b>              | <b>9.2E-08</b>                 | <b>7.03763</b> |
| <b>MPRD</b>  | <b>2</b>      | <b>0.41</b>              | <b>2.9E-07</b>                 | <b>6.53745</b> |
| <b>CXL10</b> | <b>6</b>      | <b>118</b>               | <b>4.7E-07</b>                 | <b>6.32873</b> |
| <b>PACN1</b> | <b>12</b>     | <b>0.41</b>              | <b>4.8E-07</b>                 | <b>6.31623</b> |
| <b>FSCN1</b> | <b>12</b>     | <b>11.0</b>              | <b>6.1E-07</b>                 | <b>6.21789</b> |
| <b>PRP19</b> | <b>6</b>      | <b>0.41</b>              | <b>7.6E-07</b>                 | <b>6.11827</b> |

|       |    |      |         |         |
|-------|----|------|---------|---------|
| PAF1  | 1  | 0.26 | 8.5E-07 | 6.07109 |
| VAPA  | 2  | 0.35 | 8.7E-07 | 6.06053 |
| VP13C | 6  | 0.38 | 1.1E-06 | 5.95468 |
| FLNB  | 56 | 0.44 | 1.5E-06 | 5.81446 |
| VATB2 | 6  | 0.51 | 2.6E-06 | 5.58603 |
| SC22B | 3  | 0.23 | 2.6E-06 | 5.57873 |
| CNDP2 | 21 | 0.46 | 2.8E-06 | 5.55705 |
| RAB7A | 5  | 0.36 | 3.5E-06 | 5.45817 |
| CATB  | 5  | 16.1 | 4.6E-06 | 5.34008 |
| LMNB2 | 15 | 0.36 | 5.0E-06 | 5.29722 |
| RB11B | 8  | 0.33 | 6.0E-06 | 5.21961 |
| CATC  | 14 | 33.0 | 6.3E-06 | 5.19921 |
| CLCA  | 1  | 0.40 | 6.7E-06 | 5.17594 |
| H15   | 8  | 0.46 | 9.7E-06 | 5.01341 |
| SC24C | 9  | 0.42 | 1.1E-05 | 4.94348 |
| RUXE  | 2  | 0.28 | 1.3E-05 | 4.87484 |
| VATG1 | 3  | 0.53 | 1.4E-05 | 4.84285 |
| U520  | 6  | 0.36 | 1.5E-05 | 4.83239 |
| ROCK1 | 1  | 0.49 | 1.5E-05 | 4.81531 |
| RU17  | 6  | 0.40 | 1.7E-05 | 4.76246 |
| ISG20 | 2  | 4.84 | 1.7E-05 | 4.7602  |
| PAXX  | 4  | 0.38 | 1.9E-05 | 4.71897 |
| H14   | 8  | 0.40 | 2.1E-05 | 4.66979 |
| RET4  | 5  | 0.73 | 2.4E-05 | 4.62599 |
| HNRL2 | 7  | 0.45 | 3.5E-05 | 4.45556 |
| IFNL1 | 3  | 31.7 | 3.5E-05 | 4.45432 |
| ARHG7 | 3  | 0.32 | 3.9E-05 | 4.40506 |
| FA49B | 14 | 0.45 | 4.3E-05 | 4.36917 |
| IC1   | 4  | 18.3 | 4.7E-05 | 4.33106 |
| CAB45 | 3  | 6.61 | 5.2E-05 | 4.28108 |
| SRRT  | 1  | 0.40 | 5.9E-05 | 4.22775 |
| KTN1  | 3  | 0.34 | 6.8E-05 | 4.16577 |
| CAPG  | 14 | 0.50 | 6.9E-05 | 4.15889 |
| HDAC2 | 3  | 0.27 | 7.0E-05 | 4.15783 |
| H12   | 1  | 0.43 | 8.1E-05 | 4.0913  |
| ZC3HF | 1  | 0.39 | 8.8E-05 | 4.05596 |
| LGUL  | 1  | 0.33 | 9.8E-05 | 4.00997 |
| TLN1  | 85 | 0.50 | 9.8E-05 | 4.00948 |
| VPS25 | 1  | 0.22 | 1.0E-04 | 3.99396 |
| HNRL1 | 1  | 0.36 | 1.0E-04 | 3.97964 |
| NUMA1 | 15 | 0.34 | 1.1E-04 | 3.95195 |
| HPLN3 | 5  | 43.5 | 1.1E-04 | 3.94539 |
| STAT1 | 14 | 7.51 | 1.2E-04 | 3.9333  |
| IFIT2 | 5  | 46.5 | 1.4E-04 | 3.84802 |

|                   |           |             |                |                |
|-------------------|-----------|-------------|----------------|----------------|
| <b>RBM25</b>      | <b>2</b>  | <b>0.38</b> | <b>1.4E-04</b> | <b>3.84436</b> |
| <b>AN32A</b>      | <b>4</b>  | <b>0.42</b> | <b>1.6E-04</b> | <b>3.80883</b> |
| <b>ARP2</b>       | <b>13</b> | <b>0.51</b> | <b>1.6E-04</b> | <b>3.79942</b> |
| <b>RBP56</b>      | <b>2</b>  | <b>0.39</b> | <b>1.6E-04</b> | <b>3.79507</b> |
| <b>AIMP1</b>      | <b>3</b>  | <b>0.24</b> | <b>1.7E-04</b> | <b>3.78068</b> |
| <b>KT3K</b>       | <b>1</b>  | <b>2.91</b> | <b>1.7E-04</b> | <b>3.76221</b> |
| <b>AIFM1</b>      | <b>5</b>  | <b>0.40</b> | <b>1.7E-04</b> | <b>3.75945</b> |
| <b>SRPRA</b>      | <b>1</b>  | <b>0.15</b> | <b>1.7E-04</b> | <b>3.75721</b> |
| <b>11-Sep</b>     | <b>4</b>  | <b>0.43</b> | <b>1.8E-04</b> | <b>3.744</b>   |
| <b>GNPI1</b>      | <b>4</b>  | <b>0.39</b> | <b>1.8E-04</b> | <b>3.73779</b> |
| <b>MCTS1</b>      | <b>1</b>  | <b>0.43</b> | <b>1.9E-04</b> | <b>3.72862</b> |
| <b>SEM7A</b>      | <b>8</b>  | <b>5.49</b> | <b>1.9E-04</b> | <b>3.72538</b> |
| <b>RSMB, RSMN</b> | <b>3</b>  | <b>0.45</b> | <b>2.1E-04</b> | <b>3.66776</b> |
| <b>CAPZB</b>      | <b>15</b> | <b>0.49</b> | <b>2.2E-04</b> | <b>3.66314</b> |
| <b>LYAM1</b>      | <b>3</b>  | <b>11.5</b> | <b>2.3E-04</b> | <b>3.64608</b> |
| <b>AATC</b>       | <b>8</b>  | <b>0.57</b> | <b>2.3E-04</b> | <b>3.63283</b> |
| <b>WDR1</b>       | <b>17</b> | <b>0.63</b> | <b>2.4E-04</b> | <b>3.61154</b> |
| <b>IF4H</b>       | <b>1</b>  | <b>8.60</b> | <b>2.5E-04</b> | <b>3.60206</b> |
| <b>PNOC</b>       | <b>2</b>  | <b>45.4</b> | <b>2.5E-04</b> | <b>3.59602</b> |
| <b>ACTN4</b>      | <b>46</b> | <b>0.50</b> | <b>2.7E-04</b> | <b>3.57675</b> |
| <b>SRP14</b>      | <b>3</b>  | <b>0.42</b> | <b>2.7E-04</b> | <b>3.57528</b> |
| <b>HCFC1</b>      | <b>2</b>  | <b>0.37</b> | <b>2.7E-04</b> | <b>3.56527</b> |
| <b>RAB5C</b>      | <b>2</b>  | <b>0.40</b> | <b>2.7E-04</b> | <b>3.56511</b> |
| <b>CXCL9</b>      | <b>8</b>  | <b>147</b>  | <b>2.8E-04</b> | <b>3.55705</b> |
| <b>AP2M1</b>      | <b>2</b>  | <b>0.39</b> | <b>2.9E-04</b> | <b>3.5397</b>  |
| <b>KAD2</b>       | <b>10</b> | <b>0.40</b> | <b>3.1E-04</b> | <b>3.50307</b> |
| <b>SF01</b>       | <b>4</b>  | <b>0.42</b> | <b>3.3E-04</b> | <b>3.47912</b> |
| <b>PTPRE</b>      | <b>8</b>  | <b>0.37</b> | <b>3.3E-04</b> | <b>3.47599</b> |
| <b>7-Sep</b>      | <b>11</b> | <b>0.46</b> | <b>3.3E-04</b> | <b>3.47521</b> |
| <b>GRAB</b>       | <b>2</b>  | <b>18.1</b> | <b>3.4E-04</b> | <b>3.46916</b> |
| <b>HNRPD</b>      | <b>9</b>  | <b>0.45</b> | <b>3.4E-04</b> | <b>3.46332</b> |
| <b>NH2L1</b>      | <b>1</b>  | <b>0.42</b> | <b>3.7E-04</b> | <b>3.43192</b> |
| <b>PSB1</b>       | <b>6</b>  | <b>0.47</b> | <b>4.0E-04</b> | <b>3.3933</b>  |
| <b>SPS1</b>       | <b>3</b>  | <b>0.38</b> | <b>4.1E-04</b> | <b>3.39073</b> |
| <b>PRDX2</b>      | <b>8</b>  | <b>0.56</b> | <b>4.1E-04</b> | <b>3.38977</b> |
| <b>TBL1X</b>      | <b>1</b>  | <b>0.25</b> | <b>4.1E-04</b> | <b>3.38595</b> |
| <b>CAZA2</b>      | <b>5</b>  | <b>0.50</b> | <b>4.1E-04</b> | <b>3.38426</b> |
| <b>GDIA</b>       | <b>5</b>  | <b>0.48</b> | <b>4.3E-04</b> | <b>3.36957</b> |
| <b>RAB2A</b>      | <b>3</b>  | <b>0.30</b> | <b>4.4E-04</b> | <b>3.35793</b> |
| <b>HMCS1</b>      | <b>4</b>  | <b>13.8</b> | <b>4.4E-04</b> | <b>3.35586</b> |
| <b>LANC1</b>      | <b>4</b>  | <b>0.42</b> | <b>4.6E-04</b> | <b>3.33913</b> |
| <b>HDHD2</b>      | <b>2</b>  | <b>0.41</b> | <b>4.8E-04</b> | <b>3.31912</b> |
| <b>ESYT1</b>      | <b>1</b>  | <b>0.29</b> | <b>4.8E-04</b> | <b>3.31677</b> |
| <b>DDAH2</b>      | <b>5</b>  | <b>0.37</b> | <b>5.0E-04</b> | <b>3.30417</b> |

|              |           |             |                |                |
|--------------|-----------|-------------|----------------|----------------|
| <b>COR1A</b> | <b>20</b> | <b>0.56</b> | <b>5.1E-04</b> | <b>3.29183</b> |
| <b>CATZ</b>  | <b>4</b>  | <b>3.33</b> | <b>5.3E-04</b> | <b>3.27548</b> |
| <b>DHX9</b>  | <b>9</b>  | <b>0.44</b> | <b>5.4E-04</b> | <b>3.26833</b> |
| <b>2-Sep</b> | <b>8</b>  | <b>0.41</b> | <b>5.6E-04</b> | <b>3.25524</b> |
| <b>CAP1</b>  | <b>24</b> | <b>0.56</b> | <b>5.6E-04</b> | <b>3.25065</b> |
| <b>VINC</b>  | <b>35</b> | <b>0.51</b> | <b>5.6E-04</b> | <b>3.24841</b> |
| <b>COPE</b>  | <b>5</b>  | <b>0.49</b> | <b>5.8E-04</b> | <b>3.23897</b> |
| <b>RBMX</b>  | <b>6</b>  | <b>0.47</b> | <b>6.1E-04</b> | <b>3.21453</b> |
| <b>PARK7</b> | <b>11</b> | <b>0.47</b> | <b>6.2E-04</b> | <b>3.20859</b> |
| <b>RBP2</b>  | <b>2</b>  | <b>0.26</b> | <b>6.3E-04</b> | <b>3.19846</b> |
| <b>PGK1</b>  | <b>24</b> | <b>0.57</b> | <b>6.4E-04</b> | <b>3.19716</b> |
| <b>ROAA</b>  | <b>4</b>  | <b>0.48</b> | <b>6.5E-04</b> | <b>3.18595</b> |
| <b>EIF3B</b> | <b>7</b>  | <b>0.47</b> | <b>6.9E-04</b> | <b>3.15939</b> |
| <b>PSA1</b>  | <b>11</b> | <b>0.52</b> | <b>7.0E-04</b> | <b>3.15633</b> |
| <b>SMRC2</b> | <b>4</b>  | <b>0.25</b> | <b>7.0E-04</b> | <b>3.15627</b> |
| <b>SP16H</b> | <b>4</b>  | <b>0.40</b> | <b>7.0E-04</b> | <b>3.15596</b> |
| <b>TRAD1</b> | <b>1</b>  | <b>39.1</b> | <b>7.2E-04</b> | <b>3.14363</b> |
| <b>COPA</b>  | <b>20</b> | <b>0.51</b> | <b>7.3E-04</b> | <b>3.13954</b> |
| <b>CELF2</b> | <b>1</b>  | <b>0.41</b> | <b>7.4E-04</b> | <b>3.12819</b> |
| <b>SAHH</b>  | <b>10</b> | <b>0.50</b> | <b>7.6E-04</b> | <b>3.1197</b>  |
| <b>SF3B1</b> | <b>4</b>  | <b>0.43</b> | <b>7.6E-04</b> | <b>3.11839</b> |
| <b>ENPP2</b> | <b>5</b>  | <b>12.9</b> | <b>7.7E-04</b> | <b>3.11283</b> |
| <b>RL5</b>   | <b>10</b> | <b>0.45</b> | <b>7.7E-04</b> | <b>3.11165</b> |
| <b>UBC9</b>  | <b>2</b>  | <b>0.31</b> | <b>7.8E-04</b> | <b>3.10807</b> |
| <b>APEX1</b> | <b>8</b>  | <b>0.37</b> | <b>7.8E-04</b> | <b>3.10563</b> |
| <b>IF4A2</b> | <b>4</b>  | <b>0.43</b> | <b>8.0E-04</b> | <b>3.0968</b>  |
| <b>6PGL</b>  | <b>8</b>  | <b>0.45</b> | <b>8.3E-04</b> | <b>3.07956</b> |
| <b>ILF3</b>  | <b>10</b> | <b>0.46</b> | <b>8.4E-04</b> | <b>3.07603</b> |
| <b>RMD3</b>  | <b>1</b>  | <b>0.26</b> | <b>8.5E-04</b> | <b>3.0689</b>  |
| <b>PRDX6</b> | <b>13</b> | <b>0.51</b> | <b>8.8E-04</b> | <b>3.05567</b> |
| <b>AP1B1</b> | <b>9</b>  | <b>0.51</b> | <b>9.0E-04</b> | <b>3.04793</b> |
| <b>ABHEB</b> | <b>3</b>  | <b>0.43</b> | <b>9.1E-04</b> | <b>3.04206</b> |
| <b>ARP3</b>  | <b>20</b> | <b>0.52</b> | <b>9.5E-04</b> | <b>3.02452</b> |
| <b>DDTL</b>  | <b>2</b>  | <b>0.33</b> | <b>9.9E-04</b> | <b>3.00542</b> |
| <b>TCRG1</b> | <b>1</b>  | <b>0.36</b> | <b>1.0E-03</b> | <b>3</b>       |
| <b>PML</b>   | <b>1</b>  | <b>0.35</b> | <b>1.0E-03</b> | <b>3</b>       |
| <b>RAB1A</b> | <b>1</b>  | <b>0.24</b> | <b>1.0E-03</b> | <b>3</b>       |
| <b>KYNU</b>  | <b>2</b>  | <b>0.40</b> | <b>1.0E-03</b> | <b>3</b>       |
| <b>CUL4B</b> | <b>3</b>  | <b>0.46</b> | <b>1.0E-03</b> | <b>3</b>       |
| <b>RHOA</b>  | <b>4</b>  | <b>0.51</b> | <b>1.0E-03</b> | <b>3</b>       |
| <b>PSB3</b>  | <b>4</b>  | <b>0.47</b> | <b>1.0E-03</b> | <b>3</b>       |
| <b>TSN</b>   | <b>4</b>  | <b>0.45</b> | <b>1.0E-03</b> | <b>3</b>       |
| <b>PSA3</b>  | <b>6</b>  | <b>0.53</b> | <b>1.0E-03</b> | <b>3</b>       |
| <b>MK01</b>  | <b>6</b>  | <b>0.52</b> | <b>1.0E-03</b> | <b>3</b>       |

|       |    |      |         |         |
|-------|----|------|---------|---------|
| PSA5  | 6  | 0.52 | 1.0E-03 | 3       |
| UBE2N | 6  | 0.47 | 1.0E-03 | 3       |
| SC23A | 7  | 0.46 | 1.0E-03 | 3       |
| SFPQ  | 9  | 0.65 | 1.0E-03 | 3       |
| SNAA  | 9  | 0.53 | 1.0E-03 | 3       |
| PSB4  | 9  | 0.49 | 1.0E-03 | 3       |
| MDHC  | 11 | 0.53 | 1.0E-03 | 3       |
| SLAF7 | 1  | 9.51 | 2.0E-03 | 2.69897 |
| RUXGL | 1  | 0.45 | 2.0E-03 | 2.69897 |
| LSM3  | 1  | 0.44 | 2.0E-03 | 2.69897 |
| DYL1  | 1  | 0.37 | 2.0E-03 | 2.69897 |
| STRN3 | 1  | 0.25 | 2.0E-03 | 2.69897 |
| LHPP  | 1  | 0.00 | 2.0E-03 | 2.69897 |
| AIP   | 2  | 0.52 | 2.0E-03 | 2.69897 |
| LZIC  | 2  | 0.40 | 2.0E-03 | 2.69897 |
| XRN2  | 2  | 0.34 | 2.0E-03 | 2.69897 |
| IL6   | 3  | 9.85 | 2.0E-03 | 2.69897 |
| UHL3  | 3  | 0.52 | 2.0E-03 | 2.69897 |
| H2A1D | 3  | 0.51 | 2.0E-03 | 2.69897 |
| PSB10 | 3  | 0.50 | 2.0E-03 | 2.69897 |
| NIF3L | 3  | 0.43 | 2.0E-03 | 2.69897 |
| SRP09 | 4  | 0.41 | 2.0E-03 | 2.69897 |
| ISG15 | 5  | 24.5 | 2.0E-03 | 2.69897 |
| MA1A1 | 5  | 4.49 | 2.0E-03 | 2.69897 |
| FABP5 | 5  | 0.53 | 2.0E-03 | 2.69897 |
| IAH1  | 5  | 0.37 | 2.0E-03 | 2.69897 |
| CYC   | 5  | 0.36 | 2.0E-03 | 2.69897 |
| PEBP1 | 5  | 0.32 | 2.0E-03 | 2.69897 |
| PDC6I | 6  | 0.57 | 2.0E-03 | 2.69897 |
| CAN1  | 6  | 0.50 | 2.0E-03 | 2.69897 |
| PNPH  | 6  | 0.47 | 2.0E-03 | 2.69897 |
| HNRPL | 7  | 0.54 | 2.0E-03 | 2.69897 |
| DHX15 | 7  | 0.45 | 2.0E-03 | 2.69897 |
| NPM   | 8  | 0.46 | 2.0E-03 | 2.69897 |
| ARPC2 | 9  | 0.54 | 2.0E-03 | 2.69897 |
| ILF2  | 9  | 0.48 | 2.0E-03 | 2.69897 |
| SF3B3 | 10 | 0.54 | 2.0E-03 | 2.69897 |
| NAGK  | 12 | 0.57 | 2.0E-03 | 2.69897 |
| PSA6  | 12 | 0.54 | 2.0E-03 | 2.69897 |
| CAZA1 | 12 | 0.52 | 2.0E-03 | 2.69897 |
| ADA   | 15 | 0.41 | 2.0E-03 | 2.69897 |
| CATA  | 15 | 0.41 | 2.0E-03 | 2.69897 |
| GELS  | 23 | 0.78 | 2.0E-03 | 2.69897 |
| GDIB  | 27 | 0.52 | 2.0E-03 | 2.69897 |

|       |    |      |         |         |
|-------|----|------|---------|---------|
| IQGA1 | 28 | 0.51 | 2.0E-03 | 2.69897 |
| VIME  | 34 | 0.66 | 2.0E-03 | 2.69897 |
| PP6R1 | 1  | 0.39 | 3.0E-03 | 2.52288 |
| HS105 | 2  | 3.10 | 3.0E-03 | 2.52288 |
| DNJA1 | 2  | 2.75 | 3.0E-03 | 2.52288 |
| PLIN3 | 2  | 0.55 | 3.0E-03 | 2.52288 |
| RBM8A | 2  | 0.50 | 3.0E-03 | 2.52288 |
| NUDT5 | 2  | 0.49 | 3.0E-03 | 2.52288 |
| LSM8  | 2  | 0.45 | 3.0E-03 | 2.52288 |
| SF3A1 | 2  | 0.42 | 3.0E-03 | 2.52288 |
| UBC12 | 2  | 0.41 | 3.0E-03 | 2.52288 |
| AP1S2 | 2  | 0.40 | 3.0E-03 | 2.52288 |
| PP14B | 2  | 0.36 | 3.0E-03 | 2.52288 |
| NLTP  | 2  | 0.33 | 3.0E-03 | 2.52288 |
| HSP13 | 3  | 4.27 | 3.0E-03 | 2.52288 |
| AP2B1 | 3  | 0.44 | 3.0E-03 | 2.52288 |
| DDX1  | 3  | 0.43 | 3.0E-03 | 2.52288 |
| RS21  | 3  | 0.38 | 3.0E-03 | 2.52288 |
| RL22  | 3  | 0.34 | 3.0E-03 | 2.52288 |
| PSB9  | 4  | 0.53 | 3.0E-03 | 2.52288 |
| CBX3  | 4  | 0.45 | 3.0E-03 | 2.52288 |
| STX7  | 4  | 0.26 | 3.0E-03 | 2.52288 |
| A16A1 | 5  | 0.47 | 3.0E-03 | 2.52288 |
| F10A1 | 5  | 0.46 | 3.0E-03 | 2.52288 |
| LAP2A | 6  | 0.52 | 3.0E-03 | 2.52288 |
| TPR   | 6  | 0.37 | 3.0E-03 | 2.52288 |
| EF1G  | 10 | 0.62 | 3.0E-03 | 2.52288 |
| COF1  | 10 | 0.60 | 3.0E-03 | 2.52288 |
| DCPS  | 10 | 0.42 | 3.0E-03 | 2.52288 |
| PSA7  | 11 | 0.52 | 3.0E-03 | 2.52288 |
| EIFCL | 11 | 0.51 | 3.0E-03 | 2.52288 |
| TWF2  | 11 | 0.45 | 3.0E-03 | 2.52288 |
| COPG1 | 12 | 0.55 | 3.0E-03 | 2.52288 |
| STIP1 | 13 | 0.71 | 3.0E-03 | 2.52288 |
| 1433Z | 14 | 0.55 | 3.0E-03 | 2.52288 |
| TCPA  | 15 | 0.57 | 3.0E-03 | 2.52288 |
| SQSTM | 1  | 46.0 | 4.0E-03 | 2.39794 |
| ASC   | 1  | 0.49 | 4.0E-03 | 2.39794 |
| THOC4 | 1  | 0.45 | 4.0E-03 | 2.39794 |
| H10   | 1  | 0.40 | 4.0E-03 | 2.39794 |
| CDC73 | 1  | 0.36 | 4.0E-03 | 2.39794 |
| LEO1  | 1  | 0.26 | 4.0E-03 | 2.39794 |
| DDRGK | 1  | 0.22 | 4.0E-03 | 2.39794 |
| TSNAX | 2  | 0.46 | 4.0E-03 | 2.39794 |



|       |    |      |         |         |
|-------|----|------|---------|---------|
| ERH   | 2  | 0.11 | 4.0E-03 | 2.39794 |
| SYNC  | 3  | 0.61 | 4.0E-03 | 2.39794 |
| PACN2 | 3  | 0.44 | 4.0E-03 | 2.39794 |
| 6-Sep | 4  | 0.53 | 4.0E-03 | 2.39794 |
| RO60  | 4  | 0.49 | 4.0E-03 | 2.39794 |
| SCFD1 | 4  | 0.45 | 4.0E-03 | 2.39794 |
| PA2G4 | 6  | 0.64 | 4.0E-03 | 2.39794 |
| PSB2  | 6  | 0.52 | 4.0E-03 | 2.39794 |
| ARPC3 | 7  | 0.59 | 4.0E-03 | 2.39794 |
| EF1D  | 7  | 0.58 | 4.0E-03 | 2.39794 |
| RS12  | 7  | 0.55 | 4.0E-03 | 2.39794 |
| ARPC4 | 7  | 0.52 | 4.0E-03 | 2.39794 |
| 9-Sep | 8  | 0.35 | 4.0E-03 | 2.39794 |
| ESTD  | 9  | 0.57 | 4.0E-03 | 2.39794 |
| PSB8  | 9  | 0.52 | 4.0E-03 | 2.39794 |
| LYSC  | 9  | 0.48 | 4.0E-03 | 2.39794 |
| GLOD4 | 9  | 0.45 | 4.0E-03 | 2.39794 |
| H4    | 12 | 0.63 | 4.0E-03 | 2.39794 |
| EIF3A | 13 | 0.49 | 4.0E-03 | 2.39794 |
| TAGL2 | 13 | 0.48 | 4.0E-03 | 2.39794 |
| PSA4  | 14 | 0.49 | 4.0E-03 | 2.39794 |
| PLEC  | 34 | 0.52 | 4.0E-03 | 2.39794 |
| VAS1  | 1  | 10.6 | 0.01    | 2.30103 |
| LIMD2 | 1  | 2.99 | 0.01    | 2.30103 |
| LCK   | 1  | 0.40 | 0.01    | 2.30103 |
| DKC1  | 1  | 0.36 | 0.01    | 2.30103 |
| SRS11 | 1  | 0.12 | 0.01    | 2.30103 |
| DCNL1 | 2  | 0.37 | 5.0E-03 | 2.30103 |
| HNRDL | 3  | 0.64 | 5.0E-03 | 2.30103 |
| DEK   | 3  | 0.52 | 5.0E-03 | 2.30103 |
| EIF3E | 3  | 0.50 | 5.0E-03 | 2.30103 |
| CPNS1 | 4  | 0.56 | 5.0E-03 | 2.30103 |
| VTDB  | 6  | 1.28 | 5.0E-03 | 2.30103 |
| DX39B | 7  | 0.54 | 5.0E-03 | 2.30103 |
| RL12  | 7  | 0.48 | 5.0E-03 | 2.30103 |
| RAN   | 8  | 0.54 | 5.0E-03 | 2.30103 |
| TCPH  | 13 | 0.56 | 5.0E-03 | 2.30103 |
| TCPG  | 14 | 0.58 | 5.0E-03 | 2.30103 |
| TCPD  | 16 | 0.56 | 5.0E-03 | 2.30103 |
| TCPB  | 17 | 0.58 | 5.0E-03 | 2.30103 |
| UBA1  | 24 | 0.58 | 5.0E-03 | 2.30103 |
| TIA1  | 1  | 0.61 | 0.01    | 2.22185 |
| CPSF6 | 1  | 0.51 | 0.01    | 2.22185 |
| PSMD5 | 1  | 0.45 | 0.01    | 2.22185 |

|       |    |      |         |         |
|-------|----|------|---------|---------|
| ANM1  | 2  | 0.49 | 6.0E-03 | 2.22185 |
| SMU1  | 2  | 0.46 | 6.0E-03 | 2.22185 |
| PUF60 | 2  | 0.46 | 6.0E-03 | 2.22185 |
| NGLY1 | 2  | 0.30 | 6.0E-03 | 2.22185 |
| HCLS1 | 3  | 2.94 | 6.0E-03 | 2.22185 |
| RPE   | 3  | 0.48 | 6.0E-03 | 2.22185 |
| GSHB  | 4  | 0.54 | 6.0E-03 | 2.22185 |
| HMGB2 | 6  | 0.52 | 6.0E-03 | 2.22185 |
| ACPH  | 6  | 0.51 | 6.0E-03 | 2.22185 |
| UB2V1 | 7  | 0.49 | 6.0E-03 | 2.22185 |
| GSTP1 | 9  | 0.53 | 6.0E-03 | 2.22185 |
| MVP   | 12 | 0.65 | 6.0E-03 | 2.22185 |
| 1433E | 13 | 0.54 | 6.0E-03 | 2.22185 |
| HLAE  | 1  | 29.6 | 0.01    | 2.1549  |
| NTF2  | 1  | 0.43 | 0.01    | 2.1549  |
| PFD5  | 1  | 0.36 | 0.01    | 2.1549  |
| PP14A | 1  | 0.32 | 0.01    | 2.1549  |
| CSTF3 | 1  | 0.26 | 0.01    | 2.1549  |
| EIF3I | 5  | 0.53 | 7.0E-03 | 2.1549  |
| SAE2  | 6  | 0.53 | 7.0E-03 | 2.1549  |
| PSA2  | 7  | 0.45 | 7.0E-03 | 2.1549  |
| RSSA  | 8  | 0.55 | 7.0E-03 | 2.1549  |
| BUB3  | 8  | 0.47 | 7.0E-03 | 2.1549  |
| COPD  | 8  | 0.47 | 7.0E-03 | 2.1549  |
| HNRPC | 12 | 0.58 | 7.0E-03 | 2.1549  |
| PROF1 | 13 | 0.60 | 7.0E-03 | 2.1549  |
| 1433B | 13 | 0.59 | 7.0E-03 | 2.1549  |
| ENOA  | 20 | 0.54 | 7.0E-03 | 2.1549  |
| DDX17 | 1  | 0.44 | 0.01    | 2.09691 |
| WDR82 | 1  | 0.40 | 0.01    | 2.09691 |
| SSRP1 | 2  | 0.45 | 8.0E-03 | 2.09691 |
| OSGEP | 2  | 0.43 | 8.0E-03 | 2.09691 |
| CDC37 | 5  | 0.48 | 8.0E-03 | 2.09691 |
| SYEP  | 6  | 0.39 | 8.0E-03 | 2.09691 |
| AN32B | 7  | 0.48 | 8.0E-03 | 2.09691 |
| VATA  | 9  | 0.63 | 8.0E-03 | 2.09691 |
| PSME1 | 9  | 0.57 | 8.0E-03 | 2.09691 |
| PSA   | 12 | 0.53 | 8.0E-03 | 2.09691 |
| 2AAA  | 14 | 0.54 | 8.0E-03 | 2.09691 |
| CLH1  | 37 | 0.61 | 8.0E-03 | 2.09691 |
| IRF4  | 1  | 5.72 | 0.01    | 2.04576 |
| B2MG  | 1  | 4.21 | 0.01    | 2.04576 |
| STX12 | 1  | 0.45 | 0.01    | 2.04576 |
| PLCB3 | 1  | 0.39 | 0.01    | 2.04576 |

|                   |           |             |                |                |
|-------------------|-----------|-------------|----------------|----------------|
| <b>DEOC</b>       | <b>1</b>  | <b>0.36</b> | <b>0.01</b>    | <b>2.04576</b> |
| <b>REPI1</b>      | <b>1</b>  | <b>0.18</b> | <b>0.01</b>    | <b>2.04576</b> |
| <b>P66A</b>       | <b>1</b>  | <b>0.18</b> | <b>0.01</b>    | <b>2.04576</b> |
| <b>VP26A</b>      | <b>2</b>  | <b>0.60</b> | <b>9.0E-03</b> | <b>2.04576</b> |
| <b>CPSF5</b>      | <b>2</b>  | <b>0.45</b> | <b>9.0E-03</b> | <b>2.04576</b> |
| <b>UB2L3</b>      | <b>6</b>  | <b>0.61</b> | <b>9.0E-03</b> | <b>2.04576</b> |
| <b>HDGF</b>       | <b>7</b>  | <b>0.58</b> | <b>9.0E-03</b> | <b>2.04576</b> |
| <b>TCPZ</b>       | <b>8</b>  | <b>0.60</b> | <b>9.0E-03</b> | <b>2.04576</b> |
| <b>PPIA</b>       | <b>14</b> | <b>0.60</b> | <b>9.0E-03</b> | <b>2.04576</b> |
| <b>LMNB1</b>      | <b>21</b> | <b>0.55</b> | <b>9.0E-03</b> | <b>2.04576</b> |
| <b>GLYG</b>       | <b>1</b>  | <b>0.48</b> | <b>0.01</b>    | <b>2</b>       |
| <b>LSM5</b>       | <b>1</b>  | <b>0.44</b> | <b>0.01</b>    | <b>2</b>       |
| <b>SART3</b>      | <b>1</b>  | <b>0.37</b> | <b>0.01</b>    | <b>2</b>       |
| <b>SAP</b>        | <b>3</b>  | <b>2.68</b> | <b>0.01</b>    | <b>2</b>       |
| <b>UFM1</b>       | <b>3</b>  | <b>0.48</b> | <b>0.01</b>    | <b>2</b>       |
| <b>XPP1</b>       | <b>4</b>  | <b>0.56</b> | <b>0.01</b>    | <b>2</b>       |
| <b>EWS</b>        | <b>4</b>  | <b>0.52</b> | <b>0.01</b>    | <b>2</b>       |
| <b>EIF3D</b>      | <b>5</b>  | <b>0.59</b> | <b>0.01</b>    | <b>2</b>       |
| <b>FUBP1</b>      | <b>6</b>  | <b>0.58</b> | <b>0.01</b>    | <b>2</b>       |
| <b>RBBP4</b>      | <b>9</b>  | <b>0.49</b> | <b>0.01</b>    | <b>2</b>       |
| <b>PLSL</b>       | <b>45</b> | <b>0.57</b> | <b>0.01</b>    | <b>2</b>       |
| <b>MYH9</b>       | <b>78</b> | <b>0.63</b> | <b>0.01</b>    | <b>2</b>       |
| <b>SMD1</b>       | <b>1</b>  | <b>0.36</b> | <b>0.01</b>    | <b>1.95861</b> |
| <b>NOLC1</b>      | <b>1</b>  | <b>0.29</b> | <b>0.01</b>    | <b>1.95861</b> |
| <b>SEC13</b>      | <b>2</b>  | <b>0.55</b> | <b>0.01</b>    | <b>1.95861</b> |
| <b>CZIB</b>       | <b>2</b>  | <b>0.48</b> | <b>0.01</b>    | <b>1.95861</b> |
| <b>PFD2</b>       | <b>2</b>  | <b>0.46</b> | <b>0.01</b>    | <b>1.95861</b> |
| <b>LYPA1</b>      | <b>3</b>  | <b>0.53</b> | <b>0.01</b>    | <b>1.95861</b> |
| <b>API5</b>       | <b>3</b>  | <b>0.46</b> | <b>0.01</b>    | <b>1.95861</b> |
| <b>ARF1, ARF3</b> | <b>4</b>  | <b>0.39</b> | <b>0.01</b>    | <b>1.95861</b> |
| <b>RS28</b>       | <b>5</b>  | <b>0.58</b> | <b>0.01</b>    | <b>1.95861</b> |
| <b>COPB</b>       | <b>7</b>  | <b>0.52</b> | <b>0.01</b>    | <b>1.95861</b> |
| <b>TPIS</b>       | <b>15</b> | <b>0.61</b> | <b>0.01</b>    | <b>1.95861</b> |
| <b>IRF8</b>       | <b>1</b>  | <b>83.8</b> | <b>0.01</b>    | <b>1.92082</b> |
| <b>THMS2</b>      | <b>1</b>  | <b>14.2</b> | <b>0.01</b>    | <b>1.92082</b> |
| <b>COPZ1</b>      | <b>1</b>  | <b>0.51</b> | <b>0.01</b>    | <b>1.92082</b> |
| <b>BAP18</b>      | <b>1</b>  | <b>0.49</b> | <b>0.01</b>    | <b>1.92082</b> |
| <b>LRC59</b>      | <b>1</b>  | <b>0.45</b> | <b>0.01</b>    | <b>1.92082</b> |
| <b>BIN1</b>       | <b>1</b>  | <b>0.45</b> | <b>0.01</b>    | <b>1.92082</b> |
| <b>GLGB</b>       | <b>2</b>  | <b>0.50</b> | <b>0.01</b>    | <b>1.92082</b> |
| <b>K1C17</b>      | <b>2</b>  | <b>0.21</b> | <b>0.01</b>    | <b>1.92082</b> |
| <b>GMFG</b>       | <b>3</b>  | <b>0.57</b> | <b>0.01</b>    | <b>1.92082</b> |
| <b>PLPP</b>       | <b>3</b>  | <b>0.30</b> | <b>0.01</b>    | <b>1.92082</b> |
| <b>DBNL</b>       | <b>9</b>  | <b>0.69</b> | <b>0.01</b>    | <b>1.92082</b> |

|              |           |             |             |                |
|--------------|-----------|-------------|-------------|----------------|
| <b>TPM4</b>  | <b>11</b> | <b>0.60</b> | <b>0.01</b> | <b>1.92082</b> |
| <b>IPO5</b>  | <b>12</b> | <b>0.49</b> | <b>0.01</b> | <b>1.92082</b> |
| <b>LDHB</b>  | <b>13</b> | <b>0.56</b> | <b>0.01</b> | <b>1.92082</b> |
| <b>KCAB2</b> | <b>1</b>  | <b>0.44</b> | <b>0.01</b> | <b>1.88606</b> |
| <b>EIF3K</b> | <b>2</b>  | <b>0.51</b> | <b>0.01</b> | <b>1.88606</b> |
| <b>IF1AX</b> | <b>3</b>  | <b>0.52</b> | <b>0.01</b> | <b>1.88606</b> |
| <b>SPB8</b>  | <b>4</b>  | <b>0.49</b> | <b>0.01</b> | <b>1.88606</b> |
| <b>HLAA</b>  | <b>5</b>  | <b>2.71</b> | <b>0.01</b> | <b>1.88606</b> |
| <b>GPX1</b>  | <b>5</b>  | <b>0.55</b> | <b>0.01</b> | <b>1.88606</b> |
| <b>XPO1</b>  | <b>7</b>  | <b>0.59</b> | <b>0.01</b> | <b>1.88606</b> |
| <b>KCD12</b> | <b>8</b>  | <b>0.67</b> | <b>0.01</b> | <b>1.88606</b> |
| <b>DDB1</b>  | <b>9</b>  | <b>0.50</b> | <b>0.01</b> | <b>1.88606</b> |
| <b>ACTS</b>  | <b>15</b> | <b>0.77</b> | <b>0.01</b> | <b>1.88606</b> |
| <b>TCPQ</b>  | <b>18</b> | <b>0.63</b> | <b>0.01</b> | <b>1.88606</b> |
| <b>RN213</b> | <b>1</b>  | <b>17.9</b> | <b>0.01</b> | <b>1.85387</b> |
| <b>NC2A</b>  | <b>1</b>  | <b>0.47</b> | <b>0.01</b> | <b>1.85387</b> |
| <b>RFA3</b>  | <b>1</b>  | <b>0.44</b> | <b>0.01</b> | <b>1.85387</b> |
| <b>GMPPB</b> | <b>1</b>  | <b>0.34</b> | <b>0.01</b> | <b>1.85387</b> |
| <b>FCL</b>   | <b>2</b>  | <b>0.56</b> | <b>0.01</b> | <b>1.85387</b> |
| <b>THOP1</b> | <b>2</b>  | <b>0.49</b> | <b>0.01</b> | <b>1.85387</b> |
| <b>ABRAL</b> | <b>3</b>  | <b>0.50</b> | <b>0.01</b> | <b>1.85387</b> |
| <b>SMD3</b>  | <b>4</b>  | <b>0.51</b> | <b>0.01</b> | <b>1.85387</b> |
| <b>1433F</b> | <b>6</b>  | <b>0.56</b> | <b>0.01</b> | <b>1.85387</b> |
| <b>PARP1</b> | <b>8</b>  | <b>0.41</b> | <b>0.01</b> | <b>1.85387</b> |
| <b>IFIT1</b> | <b>1</b>  | <b>8.42</b> | <b>0.02</b> | <b>1.82391</b> |
| <b>MTNB</b>  | <b>1</b>  | <b>0.35</b> | <b>0.02</b> | <b>1.82391</b> |
| <b>ELAV1</b> | <b>3</b>  | <b>0.49</b> | <b>0.02</b> | <b>1.82391</b> |
| <b>GSHR</b>  | <b>4</b>  | <b>0.59</b> | <b>0.02</b> | <b>1.82391</b> |
| <b>FUBP2</b> | <b>6</b>  | <b>0.63</b> | <b>0.02</b> | <b>1.82391</b> |
| <b>6PGD</b>  | <b>12</b> | <b>0.63</b> | <b>0.02</b> | <b>1.82391</b> |
| <b>COPB2</b> | <b>14</b> | <b>0.57</b> | <b>0.02</b> | <b>1.82391</b> |
| <b>TERA</b>  | <b>30</b> | <b>0.59</b> | <b>0.02</b> | <b>1.82391</b> |
| <b>CMPK2</b> | <b>1</b>  | <b>29.2</b> | <b>0.02</b> | <b>1.79588</b> |
| <b>SWP70</b> | <b>1</b>  | <b>2.76</b> | <b>0.02</b> | <b>1.79588</b> |
| <b>APOA1</b> | <b>1</b>  | <b>0.69</b> | <b>0.02</b> | <b>1.79588</b> |
| <b>CNPY3</b> | <b>1</b>  | <b>0.58</b> | <b>0.02</b> | <b>1.79588</b> |
| <b>BROX</b>  | <b>1</b>  | <b>0.47</b> | <b>0.02</b> | <b>1.79588</b> |
| <b>LRC47</b> | <b>1</b>  | <b>0.34</b> | <b>0.02</b> | <b>1.79588</b> |
| <b>CATS</b>  | <b>2</b>  | <b>6.80</b> | <b>0.02</b> | <b>1.79588</b> |
| <b>GMPR2</b> | <b>2</b>  | <b>0.54</b> | <b>0.02</b> | <b>1.79588</b> |
| <b>IF4E</b>  | <b>2</b>  | <b>0.53</b> | <b>0.02</b> | <b>1.79588</b> |
| <b>MGN2</b>  | <b>2</b>  | <b>0.38</b> | <b>0.02</b> | <b>1.79588</b> |
| <b>AP1M1</b> | <b>3</b>  | <b>0.39</b> | <b>0.02</b> | <b>1.79588</b> |
| <b>HNRPR</b> | <b>5</b>  | <b>0.68</b> | <b>0.02</b> | <b>1.79588</b> |

|              |           |             |             |                |
|--------------|-----------|-------------|-------------|----------------|
| <b>SET</b>   | <b>6</b>  | <b>0.53</b> | <b>0.02</b> | <b>1.79588</b> |
| <b>PGM2</b>  | <b>8</b>  | <b>0.50</b> | <b>0.02</b> | <b>1.79588</b> |
| <b>HNRPU</b> | <b>10</b> | <b>0.54</b> | <b>0.02</b> | <b>1.79588</b> |
| <b>PRDX1</b> | <b>12</b> | <b>0.64</b> | <b>0.02</b> | <b>1.79588</b> |
| <b>ARC1B</b> | <b>15</b> | <b>0.67</b> | <b>0.02</b> | <b>1.79588</b> |
| <b>TRFE</b>  | <b>65</b> | <b>0.75</b> | <b>0.02</b> | <b>1.79588</b> |
| <b>DDX3X</b> | <b>1</b>  | <b>2.31</b> | <b>0.02</b> | <b>1.76955</b> |
| <b>SFT2B</b> | <b>1</b>  | <b>0.43</b> | <b>0.02</b> | <b>1.76955</b> |
| <b>PLRG1</b> | <b>1</b>  | <b>0.37</b> | <b>0.02</b> | <b>1.76955</b> |
| <b>SMCA4</b> | <b>1</b>  | <b>0.29</b> | <b>0.02</b> | <b>1.76955</b> |
| <b>CNN2</b>  | <b>4</b>  | <b>0.54</b> | <b>0.02</b> | <b>1.76955</b> |
| <b>IF2G</b>  | <b>5</b>  | <b>0.58</b> | <b>0.02</b> | <b>1.76955</b> |
| <b>PTBP1</b> | <b>6</b>  | <b>0.48</b> | <b>0.02</b> | <b>1.76955</b> |
| <b>BUD31</b> | <b>1</b>  | <b>0.50</b> | <b>0.02</b> | <b>1.74473</b> |
| <b>LSM4</b>  | <b>1</b>  | <b>0.46</b> | <b>0.02</b> | <b>1.74473</b> |
| <b>AP1G1</b> | <b>2</b>  | <b>0.49</b> | <b>0.02</b> | <b>1.74473</b> |
| <b>CHM1B</b> | <b>2</b>  | <b>0.45</b> | <b>0.02</b> | <b>1.74473</b> |
| <b>LIS1</b>  | <b>4</b>  | <b>0.57</b> | <b>0.02</b> | <b>1.74473</b> |
| <b>GDS1</b>  | <b>5</b>  | <b>0.52</b> | <b>0.02</b> | <b>1.74473</b> |
| <b>RFA1</b>  | <b>6</b>  | <b>0.55</b> | <b>0.02</b> | <b>1.74473</b> |
| <b>HSP7C</b> | <b>28</b> | <b>0.63</b> | <b>0.02</b> | <b>1.74473</b> |
| <b>PIPNB</b> | <b>2</b>  | <b>0.62</b> | <b>0.02</b> | <b>1.72125</b> |
| <b>FKB15</b> | <b>3</b>  | <b>0.58</b> | <b>0.02</b> | <b>1.72125</b> |
| <b>IF4A3</b> | <b>3</b>  | <b>0.55</b> | <b>0.02</b> | <b>1.72125</b> |
| <b>1433T</b> | <b>5</b>  | <b>0.59</b> | <b>0.02</b> | <b>1.72125</b> |
| <b>SIAS</b>  | <b>5</b>  | <b>0.46</b> | <b>0.02</b> | <b>1.72125</b> |
| <b>MARE1</b> | <b>6</b>  | <b>0.49</b> | <b>0.02</b> | <b>1.72125</b> |
| <b>MYL6</b>  | <b>7</b>  | <b>0.66</b> | <b>0.02</b> | <b>1.72125</b> |
| <b>H2B2F</b> | <b>10</b> | <b>0.60</b> | <b>0.02</b> | <b>1.72125</b> |
| <b>TMOD3</b> | <b>1</b>  | <b>0.53</b> | <b>0.02</b> | <b>1.69897</b> |
| <b>HEBP1</b> | <b>1</b>  | <b>0.49</b> | <b>0.02</b> | <b>1.69897</b> |
| <b>2ABA</b>  | <b>2</b>  | <b>0.61</b> | <b>0.02</b> | <b>1.69897</b> |
| <b>SH3L3</b> | <b>3</b>  | <b>0.55</b> | <b>0.02</b> | <b>1.69897</b> |
| <b>EIF3H</b> | <b>4</b>  | <b>0.60</b> | <b>0.02</b> | <b>1.69897</b> |
| <b>NDKB</b>  | <b>9</b>  | <b>0.55</b> | <b>0.02</b> | <b>1.69897</b> |
| <b>DPP3</b>  | <b>14</b> | <b>0.59</b> | <b>0.02</b> | <b>1.69897</b> |
| <b>PDC10</b> | <b>1</b>  | <b>0.48</b> | <b>0.02</b> | <b>1.67778</b> |
| <b>MTA2</b>  | <b>2</b>  | <b>0.39</b> | <b>0.02</b> | <b>1.67778</b> |
| <b>SMC3</b>  | <b>2</b>  | <b>0.28</b> | <b>0.02</b> | <b>1.67778</b> |
| <b>KINH</b>  | <b>5</b>  | <b>0.66</b> | <b>0.02</b> | <b>1.67778</b> |
| <b>MGN</b>   | <b>1</b>  | <b>0.49</b> | <b>0.02</b> | <b>1.65758</b> |
| <b>CSTN1</b> | <b>2</b>  | <b>5.06</b> | <b>0.02</b> | <b>1.65758</b> |
| <b>SF3B6</b> | <b>2</b>  | <b>0.47</b> | <b>0.02</b> | <b>1.65758</b> |
| <b>PPM1G</b> | <b>4</b>  | <b>0.46</b> | <b>0.02</b> | <b>1.65758</b> |

|          |    |      |      |         |
|----------|----|------|------|---------|
| YTDC1    | 1  | 0.40 | 0.02 | 1.63827 |
| CSN4     | 2  | 0.54 | 0.02 | 1.63827 |
| UGPA     | 3  | 0.52 | 0.02 | 1.63827 |
| ADK      | 3  | 0.52 | 0.02 | 1.63827 |
| DEST     | 3  | 0.50 | 0.02 | 1.63827 |
| EMAL2    | 4  | 0.60 | 0.02 | 1.63827 |
| SYK      | 6  | 0.61 | 0.02 | 1.63827 |
| MAT2B    | 6  | 0.47 | 0.02 | 1.63827 |
| PSME2    | 10 | 0.60 | 0.02 | 1.63827 |
| RHG01    | 1  | 0.81 | 0.02 | 1.61979 |
| DHSO     | 2  | 0.47 | 0.02 | 1.61979 |
| DHPR     | 4  | 0.41 | 0.02 | 1.61979 |
| GBP3     | 1  | 21.3 | 0.03 | 1.60206 |
| MATR3    | 1  | 0.53 | 0.03 | 1.60206 |
| EF1D     | 1  | 0.49 | 0.03 | 1.60206 |
| PLST     | 1  | 0.41 | 0.03 | 1.60206 |
| DP13A    | 2  | 0.42 | 0.03 | 1.60206 |
| H33      | 3  | 0.60 | 0.03 | 1.60206 |
| MIF      | 3  | 0.51 | 0.03 | 1.60206 |
| TCPE     | 9  | 0.61 | 0.03 | 1.60206 |
| CAND1    | 10 | 0.52 | 0.03 | 1.60206 |
| SYVC     | 1  | 0.49 | 0.03 | 1.58503 |
| H13      | 2  | 0.31 | 0.03 | 1.58503 |
| SND1     | 9  | 0.68 | 0.03 | 1.58503 |
| SRP72    | 1  | 5.71 | 0.03 | 1.56864 |
| VATE1    | 1  | 0.56 | 0.03 | 1.56864 |
| RL7      | 2  | 0.57 | 0.03 | 1.56864 |
| GSLG1    | 3  | 3.18 | 0.03 | 1.56864 |
| F16P1    | 6  | 0.57 | 0.03 | 1.56864 |
| TRYP_PIG | 10 | 1.69 | 0.03 | 1.56864 |
| ALDOA    | 22 | 0.66 | 0.03 | 1.56864 |
| CSN5     | 1  | 0.57 | 0.03 | 1.55284 |
| DNJC9    | 1  | 0.49 | 0.03 | 1.55284 |
| RUXF     | 2  | 0.50 | 0.03 | 1.55284 |
| NP1L4    | 5  | 0.48 | 0.03 | 1.55284 |
| AK1A1    | 7  | 0.60 | 0.03 | 1.55284 |
| PTN6     | 16 | 0.64 | 0.03 | 1.55284 |
| TALDO    | 16 | 0.59 | 0.03 | 1.55284 |
| TPM2     | 1  | 0.45 | 0.03 | 1.5376  |
| PTPA     | 5  | 0.58 | 0.03 | 1.5376  |
| ACTB     | 21 | 0.70 | 0.03 | 1.5376  |
| UBL4A    | 1  | 0.37 | 0.03 | 1.52288 |
| MTAP     | 1  | 0.36 | 0.03 | 1.52288 |
| AP1B1    | 1  | 0.16 | 0.03 | 1.52288 |

|              |           |             |             |                |
|--------------|-----------|-------------|-------------|----------------|
| <b>GBRL2</b> | <b>2</b>  | <b>0.57</b> | <b>0.03</b> | <b>1.52288</b> |
| <b>LZTL1</b> | <b>2</b>  | <b>0.43</b> | <b>0.03</b> | <b>1.52288</b> |
| <b>CD2AP</b> | <b>5</b>  | <b>0.58</b> | <b>0.03</b> | <b>1.52288</b> |
| <b>RACK1</b> | <b>8</b>  | <b>0.63</b> | <b>0.03</b> | <b>1.52288</b> |
| <b>NPC2</b>  | <b>1</b>  | <b>2.59</b> | <b>0.03</b> | <b>1.50864</b> |
| <b>CRYM</b>  | <b>2</b>  | <b>0.26</b> | <b>0.03</b> | <b>1.50864</b> |
| <b>GDIR1</b> | <b>7</b>  | <b>0.61</b> | <b>0.03</b> | <b>1.50864</b> |
| <b>RLA0</b>  | <b>9</b>  | <b>0.57</b> | <b>0.03</b> | <b>1.49485</b> |
| <b>TPM3</b>  | <b>20</b> | <b>0.65</b> | <b>0.03</b> | <b>1.49485</b> |
| <b>STAT3</b> | <b>1</b>  | <b>6.31</b> | <b>0.03</b> | <b>1.48149</b> |
| <b>LXN</b>   | <b>1</b>  | <b>0.45</b> | <b>0.03</b> | <b>1.48149</b> |
| <b>TMA7</b>  | <b>2</b>  | <b>0.57</b> | <b>0.03</b> | <b>1.48149</b> |
| <b>EIF3G</b> | <b>2</b>  | <b>0.53</b> | <b>0.03</b> | <b>1.48149</b> |
| <b>IMPA1</b> | <b>7</b>  | <b>0.50</b> | <b>0.03</b> | <b>1.48149</b> |
| <b>LKHA4</b> | <b>18</b> | <b>0.61</b> | <b>0.03</b> | <b>1.48149</b> |
| <b>TXD17</b> | <b>2</b>  | <b>0.58</b> | <b>0.03</b> | <b>1.46852</b> |
| <b>GFRP</b>  | <b>2</b>  | <b>0.26</b> | <b>0.03</b> | <b>1.46852</b> |
| <b>SPF27</b> | <b>1</b>  | <b>0.53</b> | <b>0.04</b> | <b>1.45593</b> |
| <b>SUMO3</b> | <b>1</b>  | <b>0.51</b> | <b>0.04</b> | <b>1.45593</b> |
| <b>SC31A</b> | <b>2</b>  | <b>0.57</b> | <b>0.04</b> | <b>1.45593</b> |
| <b>TSP1</b>  | <b>1</b>  | <b>0.74</b> | <b>0.04</b> | <b>1.4437</b>  |
| <b>H2A1B</b> | <b>1</b>  | <b>0.58</b> | <b>0.04</b> | <b>1.4437</b>  |
| <b>OAS3</b>  | <b>2</b>  | <b>2.91</b> | <b>0.04</b> | <b>1.4437</b>  |
| <b>PRDX5</b> | <b>3</b>  | <b>0.56</b> | <b>0.04</b> | <b>1.4437</b>  |
| <b>PSB6</b>  | <b>3</b>  | <b>0.51</b> | <b>0.04</b> | <b>1.4437</b>  |
| <b>OTUB1</b> | <b>4</b>  | <b>0.55</b> | <b>0.04</b> | <b>1.4437</b>  |
| <b>DNJC8</b> | <b>7</b>  | <b>0.53</b> | <b>0.04</b> | <b>1.4437</b>  |
| <b>K2C6B</b> | <b>9</b>  | <b>0.35</b> | <b>0.04</b> | <b>1.4437</b>  |
| <b>RCC2</b>  | <b>13</b> | <b>0.57</b> | <b>0.04</b> | <b>1.4437</b>  |
| <b>PHF5A</b> | <b>1</b>  | <b>0.26</b> | <b>0.04</b> | <b>1.4318</b>  |
| <b>CDC42</b> | <b>4</b>  | <b>0.65</b> | <b>0.04</b> | <b>1.4318</b>  |
| <b>SYSC</b>  | <b>5</b>  | <b>0.65</b> | <b>0.04</b> | <b>1.4318</b>  |
| <b>PGM1</b>  | <b>9</b>  | <b>0.54</b> | <b>0.04</b> | <b>1.42022</b> |
| <b>ARC1A</b> | <b>2</b>  | <b>0.55</b> | <b>0.04</b> | <b>1.40894</b> |
| <b>DAZP1</b> | <b>2</b>  | <b>0.37</b> | <b>0.04</b> | <b>1.40894</b> |
| <b>HLAB</b>  | <b>4</b>  | <b>2.56</b> | <b>0.04</b> | <b>1.40894</b> |
| <b>IDHC</b>  | <b>9</b>  | <b>0.64</b> | <b>0.04</b> | <b>1.40894</b> |
| <b>CADH1</b> | <b>1</b>  | <b>3.22</b> | <b>0.04</b> | <b>1.39794</b> |
| <b>DENR</b>  | <b>1</b>  | <b>0.56</b> | <b>0.04</b> | <b>1.39794</b> |
| <b>RGS10</b> | <b>1</b>  | <b>0.56</b> | <b>0.04</b> | <b>1.39794</b> |
| <b>SASH3</b> | <b>1</b>  | <b>0.54</b> | <b>0.04</b> | <b>1.39794</b> |
| <b>HNRPQ</b> | <b>4</b>  | <b>0.65</b> | <b>0.04</b> | <b>1.39794</b> |
| <b>ARK72</b> | <b>1</b>  | <b>0.41</b> | <b>0.04</b> | <b>1.38722</b> |
| <b>SPB6</b>  | <b>2</b>  | <b>0.55</b> | <b>0.04</b> | <b>1.38722</b> |

|              |           |             |             |                |
|--------------|-----------|-------------|-------------|----------------|
| <b>ECHD1</b> | <b>2</b>  | <b>0.49</b> | <b>0.04</b> | <b>1.38722</b> |
| <b>SMC1A</b> | <b>3</b>  | <b>0.50</b> | <b>0.04</b> | <b>1.38722</b> |
| <b>CBX5</b>  | <b>3</b>  | <b>0.46</b> | <b>0.04</b> | <b>1.38722</b> |
| <b>LPXN</b>  | <b>1</b>  | <b>0.62</b> | <b>0.04</b> | <b>1.37675</b> |
| <b>EIF3F</b> | <b>2</b>  | <b>0.66</b> | <b>0.04</b> | <b>1.37675</b> |
| <b>DDX5</b>  | <b>2</b>  | <b>0.60</b> | <b>0.04</b> | <b>1.37675</b> |
| <b>ML12A</b> | <b>5</b>  | <b>0.75</b> | <b>0.04</b> | <b>1.37675</b> |
| <b>PP1A</b>  | <b>7</b>  | <b>0.63</b> | <b>0.04</b> | <b>1.37675</b> |
| <b>UFC1</b>  | <b>3</b>  | <b>0.53</b> | <b>0.04</b> | <b>1.35655</b> |
| <b>TPM3</b>  | <b>1</b>  | <b>0.67</b> | <b>0.05</b> | <b>1.34679</b> |
| <b>FMC1</b>  | <b>1</b>  | <b>0.64</b> | <b>0.05</b> | <b>1.34679</b> |
| <b>AP3D1</b> | <b>2</b>  | <b>0.17</b> | <b>0.05</b> | <b>1.34679</b> |
| <b>PTMA</b>  | <b>4</b>  | <b>3.23</b> | <b>0.05</b> | <b>1.34679</b> |
| <b>IMA3</b>  | <b>1</b>  | <b>2.33</b> | <b>0.05</b> | <b>1.33724</b> |
| <b>RBBP7</b> | <b>1</b>  | <b>0.55</b> | <b>0.05</b> | <b>1.33724</b> |
| <b>VAMP7</b> | <b>1</b>  | <b>0.41</b> | <b>0.05</b> | <b>1.33724</b> |
| <b>STRAP</b> | <b>3</b>  | <b>0.58</b> | <b>0.05</b> | <b>1.33724</b> |
| <b>RAB8A</b> | <b>3</b>  | <b>0.57</b> | <b>0.05</b> | <b>1.33724</b> |
| <b>FKB1A</b> | <b>3</b>  | <b>0.41</b> | <b>0.05</b> | <b>1.33724</b> |
| <b>IF16</b>  | <b>5</b>  | <b>0.56</b> | <b>0.05</b> | <b>1.33724</b> |
| <b>HSP74</b> | <b>12</b> | <b>0.62</b> | <b>0.05</b> | <b>1.33724</b> |
| <b>TFIP8</b> | <b>1</b>  | <b>0.64</b> | <b>0.05</b> | <b>1.3279</b>  |
| <b>MOB1A</b> | <b>1</b>  | <b>0.40</b> | <b>0.05</b> | <b>1.3279</b>  |
| <b>PEBB</b>  | <b>1</b>  | <b>0.18</b> | <b>0.05</b> | <b>1.3279</b>  |
| <b>GLRX3</b> | <b>1</b>  | <b>3.93</b> | <b>0.05</b> | <b>1.31876</b> |
| <b>PRPS2</b> | <b>3</b>  | <b>0.56</b> | <b>0.05</b> | <b>1.31876</b> |
| <b>G3BP1</b> | <b>5</b>  | <b>0.67</b> | <b>0.05</b> | <b>1.31876</b> |
| <b>GSTO1</b> | <b>6</b>  | <b>0.57</b> | <b>0.05</b> | <b>1.31876</b> |
| <b>GYS1</b>  | <b>1</b>  | <b>3.86</b> | <b>0.05</b> | <b>1.3098</b>  |
| <b>CSTF2</b> | <b>1</b>  | <b>0.51</b> | <b>0.05</b> | <b>1.3098</b>  |
| <b>LC7L3</b> | <b>1</b>  | <b>0.50</b> | <b>0.05</b> | <b>1.3098</b>  |
| <b>PP2AA</b> | <b>3</b>  | <b>0.54</b> | <b>0.05</b> | <b>1.3098</b>  |
| <b>CSN2</b>  | <b>1</b>  | <b>0.49</b> | <b>0.05</b> | <b>1.30103</b> |
| <b>PURA</b>  | <b>2</b>  | <b>0.58</b> | <b>0.05</b> | <b>1.30103</b> |
| <b>ACLY</b>  | <b>14</b> | <b>0.66</b> | <b>0.05</b> | <b>1.30103</b> |
| <b>HNRPK</b> | <b>15</b> | <b>0.71</b> | <b>0.05</b> | <b>1.30103</b> |
| <b>CY24B</b> | <b>1</b>  | <b>0.58</b> | <b>0.05</b> | <b>1.29243</b> |
| <b>RBM12</b> | <b>1</b>  | <b>0.45</b> | <b>0.05</b> | <b>1.29243</b> |
| <b>SMD2</b>  | <b>2</b>  | <b>0.50</b> | <b>0.05</b> | <b>1.29243</b> |
| <b>H2A2B</b> | <b>4</b>  | <b>0.56</b> | <b>0.05</b> | <b>1.29243</b> |
| <b>BCLF1</b> | <b>2</b>  | <b>0.55</b> | <b>0.05</b> | <b>1.284</b>   |
| <b>PAIP1</b> | <b>3</b>  | <b>0.54</b> | <b>0.05</b> | <b>1.284</b>   |
| <b>SRSF6</b> | <b>2</b>  | <b>3.15</b> | <b>0.05</b> | <b>1.27572</b> |
| <b>EIF3L</b> | <b>6</b>  | <b>0.59</b> | <b>0.05</b> | <b>1.27572</b> |



|              |           |             |             |                |
|--------------|-----------|-------------|-------------|----------------|
| <b>MX1</b>   | <b>15</b> | <b>2.46</b> | <b>0.05</b> | <b>1.27572</b> |
| <b>FUS</b>   | <b>1</b>  | <b>2.11</b> | <b>0.05</b> | <b>1.26761</b> |
| <b>SYCC</b>  | <b>1</b>  | <b>0.56</b> | <b>0.05</b> | <b>1.26761</b> |
| <b>DCTD</b>  | <b>1</b>  | <b>0.43</b> | <b>0.05</b> | <b>1.26761</b> |
| <b>ARPC5</b> | <b>4</b>  | <b>0.51</b> | <b>0.05</b> | <b>1.26761</b> |
| <b>GRB2</b>  | <b>7</b>  | <b>0.66</b> | <b>0.05</b> | <b>1.26761</b> |
| <b>CFAH</b>  | <b>1</b>  | <b>1.55</b> | <b>0.06</b> | <b>1.25964</b> |
| <b>HMCN1</b> | <b>1</b>  | <b>1.32</b> | <b>0.06</b> | <b>1.25964</b> |
| <b>PP1B</b>  | <b>1</b>  | <b>0.62</b> | <b>0.06</b> | <b>1.25964</b> |
| <b>DC1I2</b> | <b>1</b>  | <b>0.27</b> | <b>0.06</b> | <b>1.25964</b> |
| <b>NOP56</b> | <b>2</b>  | <b>0.55</b> | <b>0.06</b> | <b>1.25964</b> |
| <b>TSTD1</b> | <b>2</b>  | <b>0.51</b> | <b>0.06</b> | <b>1.25964</b> |
| <b>IST1</b>  | <b>2</b>  | <b>0.57</b> | <b>0.06</b> | <b>1.25181</b> |
| <b>1433B</b> | <b>1</b>  | <b>0.62</b> | <b>0.06</b> | <b>1.24413</b> |
| <b>LYRIC</b> | <b>1</b>  | <b>0.11</b> | <b>0.06</b> | <b>1.24413</b> |
| <b>NUCKS</b> | <b>2</b>  | <b>0.40</b> | <b>0.06</b> | <b>1.24413</b> |
| <b>ARHL2</b> | <b>3</b>  | <b>0.52</b> | <b>0.06</b> | <b>1.23657</b> |
| <b>GMPPA</b> | <b>1</b>  | <b>0.51</b> | <b>0.06</b> | <b>1.22915</b> |
| <b>EXOS4</b> | <b>1</b>  | <b>0.24</b> | <b>0.06</b> | <b>1.22915</b> |
| <b>THOC2</b> | <b>1</b>  | <b>0.35</b> | <b>0.06</b> | <b>1.22185</b> |
| <b>IF2P</b>  | <b>2</b>  | <b>0.37</b> | <b>0.06</b> | <b>1.22185</b> |
| <b>VPS35</b> | <b>4</b>  | <b>0.64</b> | <b>0.06</b> | <b>1.22185</b> |
| <b>CFAB</b>  | <b>1</b>  | <b>7.00</b> | <b>0.06</b> | <b>1.20761</b> |
| <b>SRGN</b>  | <b>1</b>  | <b>116</b>  | <b>0.06</b> | <b>1.20066</b> |
| <b>DCUP</b>  | <b>1</b>  | <b>0.27</b> | <b>0.06</b> | <b>1.20066</b> |
| <b>OLA1</b>  | <b>2</b>  | <b>0.55</b> | <b>0.06</b> | <b>1.20066</b> |
| <b>GBB1</b>  | <b>9</b>  | <b>0.67</b> | <b>0.06</b> | <b>1.20066</b> |
| <b>HARS1</b> | <b>11</b> | <b>0.59</b> | <b>0.06</b> | <b>1.20066</b> |
| <b>XRCC5</b> | <b>14</b> | <b>0.67</b> | <b>0.06</b> | <b>1.20066</b> |
| <b>SYWC</b>  | <b>15</b> | <b>1.76</b> | <b>0.06</b> | <b>1.20066</b> |
| <b>HDGR2</b> | <b>1</b>  | <b>0.10</b> | <b>0.06</b> | <b>1.19382</b> |
| <b>CPPED</b> | <b>2</b>  | <b>0.52</b> | <b>0.06</b> | <b>1.19382</b> |
| <b>RRBP1</b> | <b>21</b> | <b>0.62</b> | <b>0.06</b> | <b>1.19382</b> |
| <b>PYGB</b>  | <b>1</b>  | <b>0.62</b> | <b>0.07</b> | <b>1.18709</b> |
| <b>SYDC</b>  | <b>5</b>  | <b>0.71</b> | <b>0.07</b> | <b>1.18709</b> |
| <b>UBL5</b>  | <b>1</b>  | <b>1.86</b> | <b>0.07</b> | <b>1.18046</b> |
| <b>K1C16</b> | <b>11</b> | <b>0.23</b> | <b>0.07</b> | <b>1.18046</b> |
| <b>LA</b>    | <b>9</b>  | <b>0.63</b> | <b>0.07</b> | <b>1.17393</b> |
| <b>UB2V2</b> | <b>1</b>  | <b>0.48</b> | <b>0.07</b> | <b>1.1549</b>  |
| <b>GGCT</b>  | <b>3</b>  | <b>0.49</b> | <b>0.07</b> | <b>1.1549</b>  |
| <b>NUCL</b>  | <b>17</b> | <b>0.61</b> | <b>0.07</b> | <b>1.1549</b>  |
| <b>DCD</b>   | <b>1</b>  | <b>1.47</b> | <b>0.07</b> | <b>1.14874</b> |
| <b>PFD3</b>  | <b>2</b>  | <b>0.52</b> | <b>0.07</b> | <b>1.14874</b> |
| <b>OSBP1</b> | <b>1</b>  | <b>0.51</b> | <b>0.07</b> | <b>1.14267</b> |

|              |           |             |             |                |
|--------------|-----------|-------------|-------------|----------------|
| <b>ERF1</b>  | <b>2</b>  | <b>0.55</b> | <b>0.07</b> | <b>1.14267</b> |
| <b>NP1L1</b> | <b>5</b>  | <b>0.58</b> | <b>0.07</b> | <b>1.14267</b> |
| <b>EPS15</b> | <b>1</b>  | <b>0.44</b> | <b>0.07</b> | <b>1.13668</b> |
| <b>RTRAF</b> | <b>2</b>  | <b>0.61</b> | <b>0.07</b> | <b>1.13077</b> |
| <b>SRSF1</b> | <b>7</b>  | <b>0.65</b> | <b>0.07</b> | <b>1.13077</b> |
| <b>EIF3J</b> | <b>1</b>  | <b>0.53</b> | <b>0.08</b> | <b>1.12494</b> |
| <b>ACTG</b>  | <b>2</b>  | <b>0.39</b> | <b>0.08</b> | <b>1.12494</b> |
| <b>CBR1</b>  | <b>3</b>  | <b>0.34</b> | <b>0.08</b> | <b>1.12494</b> |
| <b>XRCC6</b> | <b>12</b> | <b>0.66</b> | <b>0.08</b> | <b>1.12494</b> |
| <b>PUR6</b>  | <b>5</b>  | <b>0.62</b> | <b>0.08</b> | <b>1.11919</b> |
| <b>TRXR1</b> | <b>7</b>  | <b>0.61</b> | <b>0.08</b> | <b>1.11919</b> |
| <b>IF4G2</b> | <b>1</b>  | <b>23.0</b> | <b>0.08</b> | <b>1.10791</b> |
| <b>3BP1</b>  | <b>2</b>  | <b>2.05</b> | <b>0.08</b> | <b>1.10791</b> |
| <b>TBCA</b>  | <b>4</b>  | <b>0.68</b> | <b>0.08</b> | <b>1.10791</b> |
| <b>IF4G1</b> | <b>1</b>  | <b>4.24</b> | <b>0.08</b> | <b>1.10237</b> |
| <b>CCAR2</b> | <b>1</b>  | <b>0.60</b> | <b>0.08</b> | <b>1.10237</b> |
| <b>U2AF2</b> | <b>2</b>  | <b>0.53</b> | <b>0.08</b> | <b>1.09691</b> |
| <b>TIMP1</b> | <b>3</b>  | <b>0.64</b> | <b>0.08</b> | <b>1.09691</b> |
| <b>FLII</b>  | <b>1</b>  | <b>0.75</b> | <b>0.08</b> | <b>1.09151</b> |
| <b>ELOC</b>  | <b>1</b>  | <b>0.58</b> | <b>0.08</b> | <b>1.09151</b> |
| <b>LDHA</b>  | <b>16</b> | <b>0.61</b> | <b>0.08</b> | <b>1.09151</b> |
| <b>RMD1</b>  | <b>1</b>  | <b>0.43</b> | <b>0.08</b> | <b>1.08619</b> |
| <b>MAP1A</b> | <b>1</b>  | <b>0.35</b> | <b>0.08</b> | <b>1.08619</b> |
| <b>NECP2</b> | <b>1</b>  | <b>0.67</b> | <b>0.08</b> | <b>1.08092</b> |
| <b>1433G</b> | <b>6</b>  | <b>0.62</b> | <b>0.08</b> | <b>1.08092</b> |
| <b>PTMS</b>  | <b>2</b>  | <b>0.43</b> | <b>0.08</b> | <b>1.07572</b> |
| <b>ANR44</b> | <b>1</b>  | <b>0.65</b> | <b>0.09</b> | <b>1.07058</b> |
| <b>G3P</b>   | <b>18</b> | <b>0.68</b> | <b>0.09</b> | <b>1.0655</b>  |
| <b>ERP29</b> | <b>6</b>  | <b>0.73</b> | <b>0.09</b> | <b>1.05552</b> |
| <b>TKT</b>   | <b>29</b> | <b>0.65</b> | <b>0.09</b> | <b>1.05552</b> |
| <b>STK24</b> | <b>1</b>  | <b>0.54</b> | <b>0.09</b> | <b>1.05061</b> |
| <b>HAT1</b>  | <b>1</b>  | <b>0.38</b> | <b>0.09</b> | <b>1.05061</b> |
| <b>THIC</b>  | <b>2</b>  | <b>0.58</b> | <b>0.09</b> | <b>1.05061</b> |
| <b>PGAM1</b> | <b>16</b> | <b>0.65</b> | <b>0.09</b> | <b>1.05061</b> |
| <b>FNTA</b>  | <b>1</b>  | <b>0.55</b> | <b>0.09</b> | <b>1.04576</b> |
| <b>B4GT1</b> | <b>2</b>  | <b>2.19</b> | <b>0.09</b> | <b>1.04576</b> |
| <b>ENOPH</b> | <b>2</b>  | <b>0.58</b> | <b>0.09</b> | <b>1.04576</b> |
| <b>TCP4</b>  | <b>8</b>  | <b>0.58</b> | <b>0.09</b> | <b>1.04096</b> |
| <b>TOP1</b>  | <b>1</b>  | <b>0.46</b> | <b>0.09</b> | <b>1.03621</b> |
| <b>DNJA2</b> | <b>2</b>  | <b>1.59</b> | <b>0.09</b> | <b>1.03621</b> |
| <b>AMPB</b>  | <b>8</b>  | <b>0.58</b> | <b>0.09</b> | <b>1.03152</b> |
| <b>PUR8</b>  | <b>1</b>  | <b>0.54</b> | <b>0.09</b> | <b>1.02687</b> |
| <b>PLEK</b>  | <b>7</b>  | <b>1.90</b> | <b>0.09</b> | <b>1.02687</b> |
| <b>ILEU</b>  | <b>13</b> | <b>0.72</b> | <b>0.09</b> | <b>1.02687</b> |

|       |    |      |      |         |
|-------|----|------|------|---------|
| TRY1  | 1  | 1.49 | 0.10 | 1.02228 |
| CK054 | 1  | 0.41 | 0.10 | 1.01773 |
| DNM1L | 1  | 0.71 | 0.10 | 1.01323 |
| DDX23 | 1  | 0.19 | 0.10 | 1.01323 |
| PDIA3 | 13 | 0.72 | 0.10 | 1.01323 |
| SF3B2 | 4  | 0.62 | 0.10 | 1.00877 |
| NDRG1 | 2  | 0.39 | 0.10 | 1.00436 |
| HLAC  | 3  | 3.17 | 0.10 | 1       |
| H31   | 2  | 0.65 | 0.10 | 0.99568 |
| CUTA  | 3  | 0.62 | 0.10 | 0.9914  |
| U5S1  | 1  | 0.60 | 0.10 | 0.98716 |
| NRDC  | 1  | 0.49 | 0.10 | 0.98716 |
| PIMT  | 4  | 0.38 | 0.10 | 0.98716 |
| PLPHP | 2  | 0.63 | 0.10 | 0.98297 |
| TEBP  | 3  | 1.84 | 0.10 | 0.98297 |
| ALDOC | 3  | 0.65 | 0.10 | 0.98297 |
| EF2   | 32 | 0.73 | 0.10 | 0.98297 |
| E2AK2 | 1  | 65.3 | 0.11 | 0.97469 |
| RS30  | 1  | 2.38 | 0.11 | 0.97469 |
| UBP14 | 4  | 0.69 | 0.11 | 0.97469 |
| MYDGF | 2  | 0.44 | 0.11 | 0.96257 |
| FKBP4 | 5  | 0.63 | 0.11 | 0.96257 |
| GDIR2 | 10 | 0.70 | 0.11 | 0.96257 |
| B2CL2 | 1  | 0.30 | 0.11 | 0.95861 |
| K2C6C | 1  | 0.42 | 0.11 | 0.95468 |
| FUMH  | 2  | 0.66 | 0.11 | 0.95078 |
| DUT   | 1  | 2.73 | 0.12 | 0.9393  |
| SPTN1 | 4  | 0.61 | 0.12 | 0.9393  |
| IF2A  | 3  | 0.65 | 0.12 | 0.93554 |
| AP2A1 | 5  | 0.61 | 0.12 | 0.93554 |
| WDR48 | 1  | 0.25 | 0.12 | 0.93181 |
| BPNT1 | 2  | 0.66 | 0.12 | 0.92812 |
| TBA1A | 1  | 1.82 | 0.12 | 0.92445 |
| ULA1  | 1  | 0.52 | 0.12 | 0.92445 |
| INS   | 2  | 1.16 | 0.12 | 0.92445 |
| IL16  | 2  | 0.62 | 0.12 | 0.92445 |
| GLRX1 | 2  | 0.57 | 0.12 | 0.92445 |
| HPRT  | 3  | 0.62 | 0.12 | 0.92445 |
| GUA A | 1  | 0.44 | 0.12 | 0.91009 |
| SCRN1 | 3  | 1.55 | 0.12 | 0.91009 |
| HORN  | 4  | 0.43 | 0.12 | 0.91009 |
| MESD  | 1  | 0.68 | 0.12 | 0.90658 |
| PTGDS | 3  | 3.78 | 0.12 | 0.90658 |
| TSSK4 | 1  | 1.25 | 0.13 | 0.90309 |

|              |           |              |             |                |
|--------------|-----------|--------------|-------------|----------------|
| <b>ELMO1</b> | <b>2</b>  | <b>0.74</b>  | <b>0.13</b> | <b>0.90309</b> |
| <b>FHL1</b>  | <b>3</b>  | <b>0.22</b>  | <b>0.13</b> | <b>0.90309</b> |
| <b>ABI1</b>  | <b>1</b>  | <b>0.59</b>  | <b>0.13</b> | <b>0.89963</b> |
| <b>CAB39</b> | <b>1</b>  | <b>0.51</b>  | <b>0.13</b> | <b>0.8962</b>  |
| <b>SH3L1</b> | <b>2</b>  | <b>0.62</b>  | <b>0.13</b> | <b>0.8962</b>  |
| <b>EDF1</b>  | <b>3</b>  | <b>0.64</b>  | <b>0.13</b> | <b>0.8962</b>  |
| <b>LSP1</b>  | <b>8</b>  | <b>0.64</b>  | <b>0.13</b> | <b>0.8962</b>  |
| <b>EIF1</b>  | <b>1</b>  | <b>1.51</b>  | <b>0.13</b> | <b>0.89279</b> |
| <b>5NTC</b>  | <b>1</b>  | <b>0.52</b>  | <b>0.13</b> | <b>0.89279</b> |
| <b>CCL19</b> | <b>1</b>  | <b>1,000</b> | <b>0.13</b> | <b>0.88941</b> |
| <b>PTPRS</b> | <b>5</b>  | <b>1.54</b>  | <b>0.13</b> | <b>0.88273</b> |
| <b>CIRBP</b> | <b>1</b>  | <b>0.57</b>  | <b>0.13</b> | <b>0.87943</b> |
| <b>CYFP2</b> | <b>3</b>  | <b>0.68</b>  | <b>0.13</b> | <b>0.87943</b> |
| <b>DCTN1</b> | <b>3</b>  | <b>0.55</b>  | <b>0.13</b> | <b>0.87943</b> |
| <b>UBP5</b>  | <b>3</b>  | <b>0.52</b>  | <b>0.13</b> | <b>0.87615</b> |
| <b>LEG1</b>  | <b>8</b>  | <b>0.69</b>  | <b>0.13</b> | <b>0.87615</b> |
| <b>PABP1</b> | <b>10</b> | <b>0.71</b>  | <b>0.13</b> | <b>0.8729</b>  |
| <b>FKBP3</b> | <b>2</b>  | <b>0.64</b>  | <b>0.14</b> | <b>0.86967</b> |
| <b>K1C14</b> | <b>5</b>  | <b>0.19</b>  | <b>0.14</b> | <b>0.86967</b> |
| <b>PUR2</b>  | <b>6</b>  | <b>1.69</b>  | <b>0.14</b> | <b>0.86967</b> |
| <b>PPCE</b>  | <b>2</b>  | <b>0.66</b>  | <b>0.14</b> | <b>0.85699</b> |
| <b>QOR</b>   | <b>4</b>  | <b>0.46</b>  | <b>0.14</b> | <b>0.85699</b> |
| <b>NMT1</b>  | <b>3</b>  | <b>0.66</b>  | <b>0.14</b> | <b>0.85387</b> |
| <b>K2C5</b>  | <b>14</b> | <b>0.29</b>  | <b>0.14</b> | <b>0.85387</b> |
| <b>AP3S1</b> | <b>1</b>  | <b>0.59</b>  | <b>0.14</b> | <b>0.84466</b> |
| <b>ALDR</b>  | <b>5</b>  | <b>0.60</b>  | <b>0.14</b> | <b>0.84466</b> |
| <b>RBM14</b> | <b>1</b>  | <b>1.79</b>  | <b>0.15</b> | <b>0.83565</b> |
| <b>PSPC1</b> | <b>1</b>  | <b>0.63</b>  | <b>0.15</b> | <b>0.83565</b> |
| <b>CHM4B</b> | <b>2</b>  | <b>1.48</b>  | <b>0.15</b> | <b>0.83565</b> |
| <b>TSYL2</b> | <b>1</b>  | <b>2.14</b>  | <b>0.15</b> | <b>0.83268</b> |
| <b>NACAM</b> | <b>2</b>  | <b>0.69</b>  | <b>0.15</b> | <b>0.83268</b> |
| <b>RS20</b>  | <b>2</b>  | <b>0.70</b>  | <b>0.15</b> | <b>0.82974</b> |
| <b>DDX6</b>  | <b>4</b>  | <b>0.72</b>  | <b>0.15</b> | <b>0.82974</b> |
| <b>TCEA1</b> | <b>4</b>  | <b>0.45</b>  | <b>0.15</b> | <b>0.82974</b> |
| <b>KSYK</b>  | <b>1</b>  | <b>1.48</b>  | <b>0.15</b> | <b>0.82681</b> |
| <b>PCBP2</b> | <b>6</b>  | <b>0.76</b>  | <b>0.15</b> | <b>0.82681</b> |
| <b>IF6</b>   | <b>4</b>  | <b>0.81</b>  | <b>0.15</b> | <b>0.82391</b> |
| <b>HMGB1</b> | <b>6</b>  | <b>0.59</b>  | <b>0.15</b> | <b>0.82102</b> |
| <b>EXOS9</b> | <b>1</b>  | <b>0.64</b>  | <b>0.15</b> | <b>0.81816</b> |
| <b>MICA1</b> | <b>1</b>  | <b>0.60</b>  | <b>0.15</b> | <b>0.81816</b> |
| <b>DCXR</b>  | <b>2</b>  | <b>0.67</b>  | <b>0.16</b> | <b>0.80967</b> |
| <b>SPTB2</b> | <b>8</b>  | <b>0.61</b>  | <b>0.16</b> | <b>0.80967</b> |
| <b>G6PI</b>  | <b>15</b> | <b>0.71</b>  | <b>0.16</b> | <b>0.80967</b> |
| <b>YBOX1</b> | <b>7</b>  | <b>0.66</b>  | <b>0.16</b> | <b>0.80688</b> |

|              |           |             |             |                |
|--------------|-----------|-------------|-------------|----------------|
| <b>IN35</b>  | <b>1</b>  | <b>1.32</b> | <b>0.16</b> | <b>0.80134</b> |
| <b>AP1G2</b> | <b>2</b>  | <b>0.31</b> | <b>0.16</b> | <b>0.7986</b>  |
| <b>BTF3</b>  | <b>1</b>  | <b>0.66</b> | <b>0.16</b> | <b>0.79588</b> |
| <b>4F2</b>   | <b>1</b>  | <b>0.55</b> | <b>0.16</b> | <b>0.79588</b> |
| <b>K2C78</b> | <b>3</b>  | <b>0.25</b> | <b>0.16</b> | <b>0.79588</b> |
| <b>RPR1B</b> | <b>1</b>  | <b>0.60</b> | <b>0.16</b> | <b>0.79048</b> |
| <b>RS8</b>   | <b>7</b>  | <b>0.66</b> | <b>0.16</b> | <b>0.79048</b> |
| <b>ANXA5</b> | <b>17</b> | <b>0.78</b> | <b>0.16</b> | <b>0.79048</b> |
| <b>ROA2</b>  | <b>19</b> | <b>0.76</b> | <b>0.16</b> | <b>0.78781</b> |
| <b>PPARD</b> | <b>1</b>  | <b>1.18</b> | <b>0.16</b> | <b>0.78516</b> |
| <b>C19L1</b> | <b>1</b>  | <b>0.43</b> | <b>0.16</b> | <b>0.78516</b> |
| <b>MP2K2</b> | <b>1</b>  | <b>1.60</b> | <b>0.17</b> | <b>0.78252</b> |
| <b>HGFA</b>  | <b>1</b>  | <b>1.65</b> | <b>0.17</b> | <b>0.77989</b> |
| <b>MFAP1</b> | <b>1</b>  | <b>0.51</b> | <b>0.17</b> | <b>0.77728</b> |
| <b>SUMO1</b> | <b>1</b>  | <b>0.45</b> | <b>0.17</b> | <b>0.77728</b> |
| <b>S10AA</b> | <b>2</b>  | <b>0.69</b> | <b>0.17</b> | <b>0.77211</b> |
| <b>IFNG</b>  | <b>1</b>  | <b>24.2</b> | <b>0.17</b> | <b>0.76955</b> |
| <b>AGFG1</b> | <b>2</b>  | <b>0.60</b> | <b>0.17</b> | <b>0.76955</b> |
| <b>RAB8B</b> | <b>1</b>  | <b>2.12</b> | <b>0.17</b> | <b>0.76195</b> |
| <b>ACL6A</b> | <b>1</b>  | <b>0.64</b> | <b>0.17</b> | <b>0.75945</b> |
| <b>ISOC1</b> | <b>2</b>  | <b>0.55</b> | <b>0.17</b> | <b>0.75945</b> |
| <b>WASP</b>  | <b>4</b>  | <b>0.61</b> | <b>0.17</b> | <b>0.75945</b> |
| <b>HV373</b> | <b>1</b>  | <b>4.68</b> | <b>0.18</b> | <b>0.75696</b> |
| <b>DESP</b>  | <b>3</b>  | <b>0.16</b> | <b>0.18</b> | <b>0.75696</b> |
| <b>HS90A</b> | <b>33</b> | <b>0.69</b> | <b>0.18</b> | <b>0.75696</b> |
| <b>RS27A</b> | <b>2</b>  | <b>0.64</b> | <b>0.18</b> | <b>0.74232</b> |
| <b>ROA1</b>  | <b>12</b> | <b>0.74</b> | <b>0.18</b> | <b>0.73993</b> |
| <b>EIF2A</b> | <b>1</b>  | <b>0.41</b> | <b>0.18</b> | <b>0.73518</b> |
| <b>RS16</b>  | <b>4</b>  | <b>0.61</b> | <b>0.18</b> | <b>0.73518</b> |
| <b>THUM1</b> | <b>1</b>  | <b>0.63</b> | <b>0.19</b> | <b>0.73283</b> |
| <b>TIGAR</b> | <b>1</b>  | <b>0.61</b> | <b>0.19</b> | <b>0.73283</b> |
| <b>UB2J1</b> | <b>1</b>  | <b>0.11</b> | <b>0.19</b> | <b>0.73283</b> |
| <b>PPM1F</b> | <b>2</b>  | <b>0.65</b> | <b>0.19</b> | <b>0.72584</b> |
| <b>H32</b>   | <b>2</b>  | <b>0.73</b> | <b>0.19</b> | <b>0.7167</b>  |
| <b>PTN11</b> | <b>2</b>  | <b>0.63</b> | <b>0.19</b> | <b>0.71444</b> |
| <b>RS11</b>  | <b>2</b>  | <b>0.64</b> | <b>0.20</b> | <b>0.70997</b> |
| <b>PCBP1</b> | <b>11</b> | <b>0.80</b> | <b>0.20</b> | <b>0.70997</b> |
| <b>RL32</b>  | <b>1</b>  | <b>0.56</b> | <b>0.20</b> | <b>0.70553</b> |
| <b>HGS</b>   | <b>1</b>  | <b>0.67</b> | <b>0.20</b> | <b>0.70333</b> |
| <b>RL17</b>  | <b>1</b>  | <b>0.65</b> | <b>0.20</b> | <b>0.69897</b> |
| <b>TRA2B</b> | <b>2</b>  | <b>0.75</b> | <b>0.20</b> | <b>0.69897</b> |
| <b>GMIP</b>  | <b>1</b>  | <b>0.52</b> | <b>0.20</b> | <b>0.6968</b>  |
| <b>RL23A</b> | <b>3</b>  | <b>0.65</b> | <b>0.20</b> | <b>0.69465</b> |
| <b>HEBP2</b> | <b>1</b>  | <b>0.64</b> | <b>0.20</b> | <b>0.6925</b>  |

|              |           |             |             |                |
|--------------|-----------|-------------|-------------|----------------|
| <b>ABRX2</b> | <b>3</b>  | <b>0.67</b> | <b>0.20</b> | <b>0.6925</b>  |
| <b>K1C9</b>  | <b>35</b> | <b>0.48</b> | <b>0.20</b> | <b>0.69037</b> |
| <b>K1C10</b> | <b>27</b> | <b>0.30</b> | <b>0.21</b> | <b>0.68613</b> |
| <b>PLCG2</b> | <b>1</b>  | <b>0.65</b> | <b>0.21</b> | <b>0.68403</b> |
| <b>RU2A</b>  | <b>1</b>  | <b>0.51</b> | <b>0.21</b> | <b>0.67985</b> |
| <b>DSC1</b>  | <b>1</b>  | <b>0.23</b> | <b>0.21</b> | <b>0.67985</b> |
| <b>SARNP</b> | <b>2</b>  | <b>0.68</b> | <b>0.21</b> | <b>0.67778</b> |
| <b>ADHX</b>  | <b>5</b>  | <b>0.64</b> | <b>0.21</b> | <b>0.67778</b> |
| <b>TPD54</b> | <b>1</b>  | <b>0.69</b> | <b>0.21</b> | <b>0.67572</b> |
| <b>NIT2</b>  | <b>1</b>  | <b>0.49</b> | <b>0.21</b> | <b>0.67366</b> |
| <b>RL18</b>  | <b>2</b>  | <b>0.67</b> | <b>0.21</b> | <b>0.67366</b> |
| <b>GIT2</b>  | <b>2</b>  | <b>0.50</b> | <b>0.21</b> | <b>0.67162</b> |
| <b>CATG</b>  | <b>1</b>  | <b>2.80</b> | <b>0.21</b> | <b>0.66959</b> |
| <b>ZRAB2</b> | <b>1</b>  | <b>0.60</b> | <b>0.22</b> | <b>0.66756</b> |
| <b>RS10</b>  | <b>1</b>  | <b>0.78</b> | <b>0.22</b> | <b>0.65758</b> |
| <b>HS71A</b> | <b>21</b> | <b>1.21</b> | <b>0.22</b> | <b>0.65758</b> |
| <b>K22E</b>  | <b>20</b> | <b>0.31</b> | <b>0.22</b> | <b>0.65561</b> |
| <b>CYTC</b>  | <b>3</b>  | <b>0.75</b> | <b>0.22</b> | <b>0.65365</b> |
| <b>AHNK</b>  | <b>5</b>  | <b>0.74</b> | <b>0.22</b> | <b>0.65365</b> |
| <b>K2C1</b>  | <b>38</b> | <b>0.37</b> | <b>0.22</b> | <b>0.65365</b> |
| <b>PSDE</b>  | <b>1</b>  | <b>0.77</b> | <b>0.22</b> | <b>0.64975</b> |
| <b>H2B1B</b> | <b>2</b>  | <b>0.70</b> | <b>0.23</b> | <b>0.64589</b> |
| <b>SGTA</b>  | <b>1</b>  | <b>0.54</b> | <b>0.23</b> | <b>0.64016</b> |
| <b>BST2</b>  | <b>2</b>  | <b>2.46</b> | <b>0.23</b> | <b>0.63827</b> |
| <b>TBB6</b>  | <b>4</b>  | <b>0.61</b> | <b>0.23</b> | <b>0.63451</b> |
| <b>CCD50</b> | <b>2</b>  | <b>0.60</b> | <b>0.23</b> | <b>0.63264</b> |
| <b>TYB4</b>  | <b>1</b>  | <b>0.78</b> | <b>0.24</b> | <b>0.62893</b> |
| <b>CIAO1</b> | <b>1</b>  | <b>0.60</b> | <b>0.24</b> | <b>0.62893</b> |
| <b>EIF3M</b> | <b>2</b>  | <b>0.67</b> | <b>0.24</b> | <b>0.62893</b> |
| <b>PFKAL</b> | <b>2</b>  | <b>0.80</b> | <b>0.24</b> | <b>0.62709</b> |
| <b>BZW1</b>  | <b>1</b>  | <b>1.62</b> | <b>0.24</b> | <b>0.62525</b> |
| <b>DYH8</b>  | <b>1</b>  | <b>1.12</b> | <b>0.24</b> | <b>0.62525</b> |
| <b>BLMH</b>  | <b>1</b>  | <b>0.72</b> | <b>0.24</b> | <b>0.6216</b>  |
| <b>RL36</b>  | <b>1</b>  | <b>0.60</b> | <b>0.24</b> | <b>0.6216</b>  |
| <b>MTND</b>  | <b>1</b>  | <b>0.38</b> | <b>0.24</b> | <b>0.61798</b> |
| <b>TPP2</b>  | <b>4</b>  | <b>0.72</b> | <b>0.24</b> | <b>0.61618</b> |
| <b>LMNA</b>  | <b>5</b>  | <b>0.63</b> | <b>0.24</b> | <b>0.61618</b> |
| <b>HEM2</b>  | <b>1</b>  | <b>0.52</b> | <b>0.24</b> | <b>0.61439</b> |
| <b>DIAP1</b> | <b>4</b>  | <b>0.78</b> | <b>0.24</b> | <b>0.61439</b> |
| <b>TPD52</b> | <b>1</b>  | <b>0.44</b> | <b>0.24</b> | <b>0.61261</b> |
| <b>RS3A</b>  | <b>9</b>  | <b>0.72</b> | <b>0.24</b> | <b>0.61261</b> |
| <b>RL27</b>  | <b>2</b>  | <b>0.72</b> | <b>0.25</b> | <b>0.60906</b> |
| <b>MYPT1</b> | <b>1</b>  | <b>0.59</b> | <b>0.25</b> | <b>0.60555</b> |
| <b>RS3</b>   | <b>6</b>  | <b>0.72</b> | <b>0.25</b> | <b>0.60555</b> |

|              |           |             |             |                |
|--------------|-----------|-------------|-------------|----------------|
| <b>FBX6</b>  | <b>1</b>  | <b>2.89</b> | <b>0.25</b> | <b>0.60033</b> |
| <b>SGT1</b>  | <b>2</b>  | <b>0.71</b> | <b>0.25</b> | <b>0.59688</b> |
| <b>AMY1</b>  | <b>2</b>  | <b>0.77</b> | <b>0.26</b> | <b>0.59346</b> |
| <b>PSMD9</b> | <b>3</b>  | <b>0.75</b> | <b>0.26</b> | <b>0.59176</b> |
| <b>PA1B2</b> | <b>1</b>  | <b>0.77</b> | <b>0.26</b> | <b>0.59007</b> |
| <b>LTOR1</b> | <b>1</b>  | <b>0.48</b> | <b>0.26</b> | <b>0.59007</b> |
| <b>NIBA1</b> | <b>1</b>  | <b>2.57</b> | <b>0.26</b> | <b>0.5867</b>  |
| <b>RAGP1</b> | <b>2</b>  | <b>0.65</b> | <b>0.26</b> | <b>0.5867</b>  |
| <b>SORCN</b> | <b>1</b>  | <b>0.73</b> | <b>0.26</b> | <b>0.58503</b> |
| <b>PTGR1</b> | <b>2</b>  | <b>0.37</b> | <b>0.26</b> | <b>0.58503</b> |
| <b>TXNL1</b> | <b>2</b>  | <b>0.76</b> | <b>0.26</b> | <b>0.5817</b>  |
| <b>SAMH1</b> | <b>19</b> | <b>0.85</b> | <b>0.27</b> | <b>0.57675</b> |
| <b>USP9X</b> | <b>1</b>  | <b>0.55</b> | <b>0.27</b> | <b>0.57349</b> |
| <b>OSTF1</b> | <b>2</b>  | <b>0.79</b> | <b>0.27</b> | <b>0.56543</b> |
| <b>AL9A1</b> | <b>1</b>  | <b>0.63</b> | <b>0.27</b> | <b>0.56225</b> |
| <b>RL4</b>   | <b>5</b>  | <b>0.72</b> | <b>0.28</b> | <b>0.55909</b> |
| <b>HV64D</b> | <b>1</b>  | <b>0.72</b> | <b>0.28</b> | <b>0.55596</b> |
| <b>RPAB3</b> | <b>1</b>  | <b>0.37</b> | <b>0.28</b> | <b>0.5544</b>  |
| <b>PAIRB</b> | <b>2</b>  | <b>0.79</b> | <b>0.28</b> | <b>0.5544</b>  |
| <b>RL30</b>  | <b>2</b>  | <b>0.70</b> | <b>0.28</b> | <b>0.5544</b>  |
| <b>PDIA1</b> | <b>12</b> | <b>0.72</b> | <b>0.28</b> | <b>0.55129</b> |
| <b>EZRI</b>  | <b>17</b> | <b>0.73</b> | <b>0.28</b> | <b>0.54975</b> |
| <b>DYHC1</b> | <b>1</b>  | <b>0.76</b> | <b>0.28</b> | <b>0.54668</b> |
| <b>PRS8</b>  | <b>1</b>  | <b>1.43</b> | <b>0.29</b> | <b>0.5391</b>  |
| <b>RL11</b>  | <b>3</b>  | <b>1.38</b> | <b>0.29</b> | <b>0.5391</b>  |
| <b>CSK2B</b> | <b>1</b>  | <b>0.76</b> | <b>0.29</b> | <b>0.5376</b>  |
| <b>HMG2</b>  | <b>2</b>  | <b>0.65</b> | <b>0.30</b> | <b>0.52578</b> |
| <b>NONO</b>  | <b>3</b>  | <b>0.80</b> | <b>0.30</b> | <b>0.52578</b> |
| <b>ANXA6</b> | <b>6</b>  | <b>0.78</b> | <b>0.30</b> | <b>0.52578</b> |
| <b>SYFA</b>  | <b>1</b>  | <b>0.71</b> | <b>0.30</b> | <b>0.52288</b> |
| <b>RL21</b>  | <b>1</b>  | <b>0.69</b> | <b>0.30</b> | <b>0.52288</b> |
| <b>RL10A</b> | <b>5</b>  | <b>0.78</b> | <b>0.30</b> | <b>0.52288</b> |
| <b>PSME3</b> | <b>2</b>  | <b>0.71</b> | <b>0.30</b> | <b>0.52143</b> |
| <b>LV469</b> | <b>1</b>  | <b>2.47</b> | <b>0.30</b> | <b>0.51999</b> |
| <b>PHP14</b> | <b>1</b>  | <b>0.37</b> | <b>0.30</b> | <b>0.51999</b> |
| <b>CNTN1</b> | <b>2</b>  | <b>1.08</b> | <b>0.30</b> | <b>0.51856</b> |
| <b>U2AF5</b> | <b>1</b>  | <b>0.74</b> | <b>0.30</b> | <b>0.51713</b> |
| <b>SKP1</b>  | <b>1</b>  | <b>0.48</b> | <b>0.31</b> | <b>0.5157</b>  |
| <b>A2MG</b>  | <b>1</b>  | <b>1.41</b> | <b>0.31</b> | <b>0.51286</b> |
| <b>RS7</b>   | <b>2</b>  | <b>0.67</b> | <b>0.31</b> | <b>0.51145</b> |
| <b>OXSR1</b> | <b>1</b>  | <b>0.72</b> | <b>0.31</b> | <b>0.50864</b> |
| <b>RL35A</b> | <b>1</b>  | <b>2.00</b> | <b>0.31</b> | <b>0.50724</b> |
| <b>HYOU1</b> | <b>3</b>  | <b>1.34</b> | <b>0.31</b> | <b>0.50724</b> |
| <b>BGH3</b>  | <b>7</b>  | <b>0.81</b> | <b>0.31</b> | <b>0.50585</b> |

|              |           |             |             |                |
|--------------|-----------|-------------|-------------|----------------|
| <b>CO4A</b>  | <b>2</b>  | <b>1.16</b> | <b>0.31</b> | <b>0.50446</b> |
| <b>ABCE1</b> | <b>1</b>  | <b>0.61</b> | <b>0.31</b> | <b>0.50307</b> |
| <b>PIN1</b>  | <b>1</b>  | <b>0.66</b> | <b>0.32</b> | <b>0.50169</b> |
| <b>HNRH1</b> | <b>9</b>  | <b>0.84</b> | <b>0.32</b> | <b>0.50169</b> |
| <b>SPB12</b> | <b>1</b>  | <b>0.40</b> | <b>0.32</b> | <b>0.50031</b> |
| <b>LRRF1</b> | <b>1</b>  | <b>0.86</b> | <b>0.32</b> | <b>0.49894</b> |
| <b>GILT</b>  | <b>1</b>  | <b>1.34</b> | <b>0.32</b> | <b>0.49757</b> |
| <b>RAB10</b> | <b>1</b>  | <b>0.79</b> | <b>0.32</b> | <b>0.48945</b> |
| <b>NPL4</b>  | <b>1</b>  | <b>0.75</b> | <b>0.32</b> | <b>0.48945</b> |
| <b>DYN2</b>  | <b>3</b>  | <b>0.70</b> | <b>0.32</b> | <b>0.48945</b> |
| <b>RL3</b>   | <b>6</b>  | <b>0.75</b> | <b>0.32</b> | <b>0.48945</b> |
| <b>PDCD6</b> | <b>1</b>  | <b>0.72</b> | <b>0.33</b> | <b>0.48812</b> |
| <b>BLVRB</b> | <b>1</b>  | <b>1.71</b> | <b>0.33</b> | <b>0.48413</b> |
| <b>RS4X</b>  | <b>2</b>  | <b>0.67</b> | <b>0.33</b> | <b>0.48413</b> |
| <b>HS90B</b> | <b>17</b> | <b>0.79</b> | <b>0.33</b> | <b>0.4828</b>  |
| <b>CH60</b>  | <b>3</b>  | <b>1.63</b> | <b>0.33</b> | <b>0.48149</b> |
| <b>SAFB1</b> | <b>2</b>  | <b>0.67</b> | <b>0.33</b> | <b>0.48017</b> |
| <b>URP2</b>  | <b>11</b> | <b>0.81</b> | <b>0.33</b> | <b>0.48017</b> |
| <b>FRIL</b>  | <b>1</b>  | <b>1.88</b> | <b>0.33</b> | <b>0.47886</b> |
| <b>AIF1</b>  | <b>2</b>  | <b>0.81</b> | <b>0.33</b> | <b>0.47625</b> |
| <b>SAP18</b> | <b>1</b>  | <b>0.63</b> | <b>0.34</b> | <b>0.47237</b> |
| <b>PSIP1</b> | <b>1</b>  | <b>0.50</b> | <b>0.34</b> | <b>0.47237</b> |
| <b>S10AB</b> | <b>1</b>  | <b>0.75</b> | <b>0.34</b> | <b>0.46852</b> |
| <b>GRHPR</b> | <b>1</b>  | <b>0.68</b> | <b>0.34</b> | <b>0.46725</b> |
| <b>UBR4</b>  | <b>1</b>  | <b>2.28</b> | <b>0.34</b> | <b>0.46597</b> |
| <b>GLU2B</b> | <b>1</b>  | <b>0.74</b> | <b>0.34</b> | <b>0.46597</b> |
| <b>NUDC</b>  | <b>1</b>  | <b>0.74</b> | <b>0.34</b> | <b>0.46471</b> |
| <b>NT5D1</b> | <b>1</b>  | <b>0.67</b> | <b>0.34</b> | <b>0.46471</b> |
| <b>USO1</b>  | <b>7</b>  | <b>0.78</b> | <b>0.34</b> | <b>0.46471</b> |
| <b>CAR11</b> | <b>1</b>  | <b>0.46</b> | <b>0.35</b> | <b>0.46218</b> |
| <b>IPP2B</b> | <b>1</b>  | <b>1.98</b> | <b>0.35</b> | <b>0.46092</b> |
| <b>HSPB1</b> | <b>1</b>  | <b>0.64</b> | <b>0.35</b> | <b>0.45842</b> |
| <b>PSD11</b> | <b>3</b>  | <b>1.31</b> | <b>0.35</b> | <b>0.45842</b> |
| <b>FPPS</b>  | <b>1</b>  | <b>1.69</b> | <b>0.35</b> | <b>0.45223</b> |
| <b>FYB1</b>  | <b>1</b>  | <b>0.41</b> | <b>0.35</b> | <b>0.451</b>   |
| <b>RHG25</b> | <b>1</b>  | <b>0.71</b> | <b>0.36</b> | <b>0.44855</b> |
| <b>AK1C3</b> | <b>3</b>  | <b>0.62</b> | <b>0.36</b> | <b>0.44855</b> |
| <b>DRB5</b>  | <b>2</b>  | <b>1.51</b> | <b>0.36</b> | <b>0.44249</b> |
| <b>ITB2</b>  | <b>3</b>  | <b>1.53</b> | <b>0.36</b> | <b>0.4389</b>  |
| <b>RS26</b>  | <b>2</b>  | <b>0.65</b> | <b>0.37</b> | <b>0.43533</b> |
| <b>CLIC1</b> | <b>12</b> | <b>0.82</b> | <b>0.37</b> | <b>0.43533</b> |
| <b>NNRE</b>  | <b>1</b>  | <b>0.66</b> | <b>0.37</b> | <b>0.43297</b> |
| <b>RL15</b>  | <b>1</b>  | <b>0.63</b> | <b>0.37</b> | <b>0.43297</b> |
| <b>THIO</b>  | <b>5</b>  | <b>1.25</b> | <b>0.37</b> | <b>0.43297</b> |



|                   |           |             |             |                |
|-------------------|-----------|-------------|-------------|----------------|
| <b>COMD2</b>      | <b>1</b>  | <b>1.44</b> | <b>0.37</b> | <b>0.4318</b>  |
| <b>RBM3</b>       | <b>1</b>  | <b>0.56</b> | <b>0.37</b> | <b>0.4318</b>  |
| <b>F120A</b>      | <b>1</b>  | <b>2.39</b> | <b>0.37</b> | <b>0.43063</b> |
| <b>CFAI</b>       | <b>4</b>  | <b>1.09</b> | <b>0.37</b> | <b>0.43063</b> |
| <b>G6PD</b>       | <b>2</b>  | <b>0.80</b> | <b>0.37</b> | <b>0.42829</b> |
| <b>MOES</b>       | <b>43</b> | <b>0.82</b> | <b>0.38</b> | <b>0.42597</b> |
| <b>CAPR1</b>      | <b>1</b>  | <b>0.80</b> | <b>0.38</b> | <b>0.41908</b> |
| <b>RL7A</b>       | <b>2</b>  | <b>0.74</b> | <b>0.38</b> | <b>0.41908</b> |
| <b>KV315</b>      | <b>2</b>  | <b>1.40</b> | <b>0.38</b> | <b>0.41794</b> |
| <b>VPS29</b>      | <b>1</b>  | <b>0.66</b> | <b>0.38</b> | <b>0.4168</b>  |
| <b>IGJ</b>        | <b>8</b>  | <b>1.28</b> | <b>0.38</b> | <b>0.41567</b> |
| <b>PSMD2</b>      | <b>3</b>  | <b>0.82</b> | <b>0.39</b> | <b>0.41454</b> |
| <b>PP1R7</b>      | <b>1</b>  | <b>0.68</b> | <b>0.39</b> | <b>0.41117</b> |
| <b>LV310</b>      | <b>1</b>  | <b>1.24</b> | <b>0.39</b> | <b>0.40894</b> |
| <b>RS2</b>        | <b>2</b>  | <b>0.81</b> | <b>0.39</b> | <b>0.40561</b> |
| <b>PTPRC</b>      | <b>2</b>  | <b>0.69</b> | <b>0.40</b> | <b>0.4023</b>  |
| <b>PSB5</b>       | <b>1</b>  | <b>0.56</b> | <b>0.40</b> | <b>0.40121</b> |
| <b>UBP15</b>      | <b>1</b>  | <b>1.40</b> | <b>0.40</b> | <b>0.39903</b> |
| <b>KPYM</b>       | <b>28</b> | <b>0.85</b> | <b>0.40</b> | <b>0.39903</b> |
| <b>KV401</b>      | <b>2</b>  | <b>1.52</b> | <b>0.40</b> | <b>0.39794</b> |
| <b>SAMP</b>       | <b>1</b>  | <b>1.14</b> | <b>0.40</b> | <b>0.39577</b> |
| <b>BIN2</b>       | <b>4</b>  | <b>0.77</b> | <b>0.40</b> | <b>0.39577</b> |
| <b>IMDH2</b>      | <b>1</b>  | <b>1.30</b> | <b>0.40</b> | <b>0.39469</b> |
| <b>JAML</b>       | <b>1</b>  | <b>0.68</b> | <b>0.40</b> | <b>0.39469</b> |
| <b>CO6</b>        | <b>1</b>  | <b>1.71</b> | <b>0.40</b> | <b>0.39362</b> |
| <b>UBE2K</b>      | <b>1</b>  | <b>0.61</b> | <b>0.41</b> | <b>0.39147</b> |
| <b>EF1B</b>       | <b>3</b>  | <b>0.79</b> | <b>0.41</b> | <b>0.38722</b> |
| <b>P85A</b>       | <b>1</b>  | <b>0.67</b> | <b>0.42</b> | <b>0.38091</b> |
| <b>ZCCHV</b>      | <b>2</b>  | <b>1.41</b> | <b>0.42</b> | <b>0.38091</b> |
| <b>SC23B</b>      | <b>4</b>  | <b>0.83</b> | <b>0.42</b> | <b>0.38091</b> |
| <b>HNRPF</b>      | <b>5</b>  | <b>0.84</b> | <b>0.42</b> | <b>0.38091</b> |
| <b>FAS</b>        | <b>2</b>  | <b>1.33</b> | <b>0.42</b> | <b>0.37469</b> |
| <b>RL19</b>       | <b>2</b>  | <b>0.75</b> | <b>0.42</b> | <b>0.37469</b> |
| <b>PIIB</b>       | <b>7</b>  | <b>0.82</b> | <b>0.42</b> | <b>0.37469</b> |
| <b>RAVR1</b>      | <b>1</b>  | <b>0.62</b> | <b>0.42</b> | <b>0.37366</b> |
| <b>RS17</b>       | <b>3</b>  | <b>0.75</b> | <b>0.42</b> | <b>0.37366</b> |
| <b>ALBU_BOVIN</b> | <b>95</b> | <b>1.08</b> | <b>0.42</b> | <b>0.37263</b> |
| <b>NASP</b>       | <b>5</b>  | <b>0.82</b> | <b>0.43</b> | <b>0.37059</b> |
| <b>ANT3</b>       | <b>4</b>  | <b>1.16</b> | <b>0.43</b> | <b>0.36552</b> |
| <b>PP1G</b>       | <b>1</b>  | <b>0.69</b> | <b>0.43</b> | <b>0.36351</b> |
| <b>LAMC1</b>      | <b>3</b>  | <b>0.78</b> | <b>0.44</b> | <b>0.36051</b> |
| <b>NUDC1</b>      | <b>1</b>  | <b>0.68</b> | <b>0.44</b> | <b>0.35952</b> |
| <b>IDHP</b>       | <b>1</b>  | <b>1.71</b> | <b>0.44</b> | <b>0.35853</b> |
| <b>TES</b>        | <b>1</b>  | <b>0.79</b> | <b>0.44</b> | <b>0.35754</b> |

|              |           |             |             |                |
|--------------|-----------|-------------|-------------|----------------|
| <b>PPIH</b>  | <b>1</b>  | <b>0.70</b> | <b>0.44</b> | <b>0.35458</b> |
| <b>S10A4</b> | <b>3</b>  | <b>0.83</b> | <b>0.45</b> | <b>0.35164</b> |
| <b>UBE3A</b> | <b>1</b>  | <b>0.70</b> | <b>0.45</b> | <b>0.35067</b> |
| <b>AB1IP</b> | <b>2</b>  | <b>0.81</b> | <b>0.45</b> | <b>0.34486</b> |
| <b>PDIA6</b> | <b>4</b>  | <b>0.81</b> | <b>0.46</b> | <b>0.33724</b> |
| <b>SPB9</b>  | <b>12</b> | <b>0.78</b> | <b>0.47</b> | <b>0.33255</b> |
| <b>UBA6</b>  | <b>1</b>  | <b>0.49</b> | <b>0.47</b> | <b>0.33068</b> |
| <b>KVD11</b> | <b>2</b>  | <b>1.52</b> | <b>0.47</b> | <b>0.32606</b> |
| <b>FA98B</b> | <b>2</b>  | <b>0.71</b> | <b>0.48</b> | <b>0.32148</b> |
| <b>UBCP1</b> | <b>1</b>  | <b>0.69</b> | <b>0.48</b> | <b>0.31695</b> |
| <b>FLNA</b>  | <b>49</b> | <b>0.85</b> | <b>0.48</b> | <b>0.31695</b> |
| <b>TCOF</b>  | <b>4</b>  | <b>1.16</b> | <b>0.48</b> | <b>0.31515</b> |
| <b>TCTP</b>  | <b>3</b>  | <b>0.84</b> | <b>0.49</b> | <b>0.31247</b> |
| <b>EF1A1</b> | <b>19</b> | <b>1.13</b> | <b>0.49</b> | <b>0.31158</b> |
| <b>KV116</b> | <b>1</b>  | <b>1.94</b> | <b>0.49</b> | <b>0.31069</b> |
| <b>RINI</b>  | <b>10</b> | <b>0.86</b> | <b>0.49</b> | <b>0.30715</b> |
| <b>IF4A1</b> | <b>9</b>  | <b>1.19</b> | <b>0.50</b> | <b>0.30364</b> |
| <b>RAP1A</b> | <b>1</b>  | <b>0.82</b> | <b>0.50</b> | <b>0.3019</b>  |
| <b>FETUA</b> | <b>1</b>  | <b>1.22</b> | <b>0.50</b> | <b>0.29843</b> |
| <b>IREB2</b> | <b>1</b>  | <b>0.75</b> | <b>0.50</b> | <b>0.29843</b> |
| <b>RALY</b>  | <b>2</b>  | <b>1.16</b> | <b>0.50</b> | <b>0.29757</b> |
| <b>PSB7</b>  | <b>1</b>  | <b>0.61</b> | <b>0.51</b> | <b>0.29585</b> |
| <b>MPRI</b>  | <b>1</b>  | <b>1.43</b> | <b>0.51</b> | <b>0.29328</b> |
| <b>APOH</b>  | <b>1</b>  | <b>1.09</b> | <b>0.51</b> | <b>0.29328</b> |
| <b>CREG1</b> | <b>1</b>  | <b>1.20</b> | <b>0.51</b> | <b>0.29158</b> |
| <b>RS6</b>   | <b>3</b>  | <b>0.83</b> | <b>0.52</b> | <b>0.28735</b> |
| <b>KAP2</b>  | <b>1</b>  | <b>0.84</b> | <b>0.52</b> | <b>0.28567</b> |
| <b>ANXA2</b> | <b>16</b> | <b>0.90</b> | <b>0.52</b> | <b>0.28567</b> |
| <b>PSMD3</b> | <b>3</b>  | <b>0.85</b> | <b>0.52</b> | <b>0.284</b>   |
| <b>SF3A3</b> | <b>1</b>  | <b>0.72</b> | <b>0.52</b> | <b>0.28316</b> |
| <b>EHD1</b>  | <b>4</b>  | <b>0.79</b> | <b>0.52</b> | <b>0.28067</b> |
| <b>ACAP1</b> | <b>1</b>  | <b>0.47</b> | <b>0.53</b> | <b>0.27901</b> |
| <b>GARS</b>  | <b>1</b>  | <b>0.83</b> | <b>0.53</b> | <b>0.27737</b> |
| <b>MAP4</b>  | <b>4</b>  | <b>0.79</b> | <b>0.53</b> | <b>0.27737</b> |
| <b>MYO1E</b> | <b>1</b>  | <b>0.82</b> | <b>0.53</b> | <b>0.27654</b> |
| <b>HV69D</b> | <b>1</b>  | <b>1.30</b> | <b>0.53</b> | <b>0.27572</b> |
| <b>APT</b>   | <b>1</b>  | <b>0.83</b> | <b>0.54</b> | <b>0.27084</b> |
| <b>TRFL</b>  | <b>3</b>  | <b>0.89</b> | <b>0.54</b> | <b>0.26922</b> |
| <b>TBA1C</b> | <b>18</b> | <b>1.17</b> | <b>0.54</b> | <b>0.26841</b> |
| <b>DRA</b>   | <b>1</b>  | <b>1.28</b> | <b>0.54</b> | <b>0.26761</b> |
| <b>MY18A</b> | <b>3</b>  | <b>0.79</b> | <b>0.54</b> | <b>0.26761</b> |
| <b>CYBP</b>  | <b>2</b>  | <b>0.85</b> | <b>0.54</b> | <b>0.2668</b>  |
| <b>PCNA</b>  | <b>5</b>  | <b>0.82</b> | <b>0.54</b> | <b>0.2652</b>  |
| <b>EMAL4</b> | <b>1</b>  | <b>0.74</b> | <b>0.55</b> | <b>0.2636</b>  |

|       |    |      |      |         |
|-------|----|------|------|---------|
| ABC3C | 1  | 1.41 | 0.55 | 0.26122 |
| HV307 | 2  | 1.18 | 0.55 | 0.26043 |
| A1BG  | 1  | 1.10 | 0.55 | 0.25727 |
| SYTC  | 3  | 0.85 | 0.56 | 0.25259 |
| SPSY  | 1  | 1.16 | 0.57 | 0.24718 |
| RS25  | 2  | 0.79 | 0.57 | 0.24718 |
| BIEA  | 2  | 1.21 | 0.57 | 0.24336 |
| RS18  | 2  | 1.30 | 0.57 | 0.2426  |
| IMB1  | 5  | 0.85 | 0.57 | 0.24185 |
| SRSF7 | 2  | 0.86 | 0.57 | 0.24109 |
| HNRPM | 4  | 1.14 | 0.58 | 0.23958 |
| CD44  | 1  | 0.78 | 0.58 | 0.23882 |
| YTHD2 | 2  | 0.86 | 0.58 | 0.23882 |
| HV118 | 1  | 0.73 | 0.58 | 0.23508 |
| LV321 | 2  | 1.17 | 0.58 | 0.23508 |
| A2AP  | 1  | 1.07 | 0.58 | 0.23359 |
| SRSF3 | 1  | 0.86 | 0.58 | 0.23359 |
| ACTN1 | 3  | 0.86 | 0.58 | 0.23359 |
| IGHG3 | 6  | 0.87 | 0.58 | 0.23359 |
| PSMD4 | 3  | 0.90 | 0.59 | 0.2321  |
| NHRF1 | 1  | 1.33 | 0.59 | 0.22621 |
| SRSF8 | 1  | 0.85 | 0.60 | 0.22113 |
| ERP44 | 1  | 1.19 | 0.60 | 0.2204  |
| HV321 | 2  | 1.27 | 0.60 | 0.21968 |
| LV147 | 1  | 1.19 | 0.60 | 0.21896 |
| RS5   | 4  | 0.92 | 0.60 | 0.21896 |
| PCNP  | 1  | 1.18 | 0.61 | 0.21681 |
| GBB2  | 2  | 0.86 | 0.61 | 0.21467 |
| CO3A1 | 1  | 1.07 | 0.61 | 0.21325 |
| IGHM  | 19 | 1.29 | 0.61 | 0.21325 |
| DDI2  | 1  | 1.16 | 0.61 | 0.21183 |
| METK2 | 3  | 0.93 | 0.62 | 0.21042 |
| HV102 | 1  | 0.64 | 0.62 | 0.20691 |
| GSH1  | 1  | 0.83 | 0.63 | 0.20412 |
| RL24  | 2  | 0.84 | 0.63 | 0.20412 |
| H2AZ  | 2  | 0.77 | 0.63 | 0.20273 |
| SYAC  | 5  | 0.80 | 0.63 | 0.20273 |
| TRIR  | 1  | 1.28 | 0.63 | 0.19928 |
| IF4B  | 3  | 1.17 | 0.63 | 0.1986  |
| ARI1  | 1  | 1.49 | 0.64 | 0.19723 |
| DDX42 | 2  | 1.22 | 0.64 | 0.19723 |
| RL37  | 1  | 1.39 | 0.64 | 0.1945  |
| KVD24 | 1  | 1.24 | 0.64 | 0.19246 |
| AOC3  | 1  | 0.89 | 0.65 | 0.18977 |

|              |           |             |             |                |
|--------------|-----------|-------------|-------------|----------------|
| <b>RL8</b>   | <b>3</b>  | <b>0.88</b> | <b>0.65</b> | <b>0.18709</b> |
| <b>MK14</b>  | <b>1</b>  | <b>0.82</b> | <b>0.65</b> | <b>0.18575</b> |
| <b>FIBB</b>  | <b>1</b>  | <b>0.90</b> | <b>0.66</b> | <b>0.18243</b> |
| <b>PDLI5</b> | <b>1</b>  | <b>1.23</b> | <b>0.66</b> | <b>0.18177</b> |
| <b>RANG</b>  | <b>2</b>  | <b>1.11</b> | <b>0.66</b> | <b>0.18111</b> |
| <b>LV151</b> | <b>1</b>  | <b>1.35</b> | <b>0.67</b> | <b>0.17718</b> |
| <b>PDIA4</b> | <b>10</b> | <b>1.11</b> | <b>0.67</b> | <b>0.17522</b> |
| <b>PK3CD</b> | <b>1</b>  | <b>0.82</b> | <b>0.67</b> | <b>0.17393</b> |
| <b>SF3A2</b> | <b>1</b>  | <b>0.82</b> | <b>0.68</b> | <b>0.1707</b>  |
| <b>TETN</b>  | <b>3</b>  | <b>0.96</b> | <b>0.68</b> | <b>0.16877</b> |
| <b>S10A9</b> | <b>3</b>  | <b>1.18</b> | <b>0.68</b> | <b>0.16813</b> |
| <b>THBG</b>  | <b>2</b>  | <b>1.07</b> | <b>0.68</b> | <b>0.16685</b> |
| <b>RL28</b>  | <b>1</b>  | <b>1.37</b> | <b>0.68</b> | <b>0.16558</b> |
| <b>IF5A1</b> | <b>4</b>  | <b>0.92</b> | <b>0.69</b> | <b>0.16368</b> |
| <b>RLA2</b>  | <b>4</b>  | <b>0.89</b> | <b>0.69</b> | <b>0.16368</b> |
| <b>LASP1</b> | <b>2</b>  | <b>0.87</b> | <b>0.69</b> | <b>0.16178</b> |
| <b>TBB5</b>  | <b>23</b> | <b>1.11</b> | <b>0.69</b> | <b>0.16052</b> |
| <b>RL37A</b> | <b>2</b>  | <b>1.19</b> | <b>0.69</b> | <b>0.15927</b> |
| <b>ICAL</b>  | <b>3</b>  | <b>0.89</b> | <b>0.69</b> | <b>0.15864</b> |
| <b>GAPR1</b> | <b>1</b>  | <b>1.11</b> | <b>0.70</b> | <b>0.1549</b>  |
| <b>TBB4B</b> | <b>1</b>  | <b>0.90</b> | <b>0.70</b> | <b>0.1549</b>  |
| <b>PICAL</b> | <b>1</b>  | <b>0.86</b> | <b>0.70</b> | <b>0.15304</b> |
| <b>PSMD6</b> | <b>1</b>  | <b>0.91</b> | <b>0.71</b> | <b>0.15181</b> |
| <b>NSF1C</b> | <b>2</b>  | <b>0.92</b> | <b>0.71</b> | <b>0.15181</b> |
| <b>KV320</b> | <b>2</b>  | <b>1.21</b> | <b>0.71</b> | <b>0.1512</b>  |
| <b>LAMB1</b> | <b>1</b>  | <b>0.85</b> | <b>0.71</b> | <b>0.14997</b> |
| <b>CLIC3</b> | <b>2</b>  | <b>1.15</b> | <b>0.71</b> | <b>0.14935</b> |
| <b>CORO7</b> | <b>1</b>  | <b>1.22</b> | <b>0.71</b> | <b>0.14874</b> |
| <b>DTD1</b>  | <b>1</b>  | <b>0.74</b> | <b>0.71</b> | <b>0.14874</b> |
| <b>IGHG2</b> | <b>11</b> | <b>1.12</b> | <b>0.71</b> | <b>0.14874</b> |
| <b>RTCB</b>  | <b>1</b>  | <b>0.88</b> | <b>0.71</b> | <b>0.14813</b> |
| <b>CSK</b>   | <b>1</b>  | <b>1.11</b> | <b>0.71</b> | <b>0.14752</b> |
| <b>PRS7</b>  | <b>2</b>  | <b>1.12</b> | <b>0.71</b> | <b>0.14752</b> |
| <b>ENPL</b>  | <b>20</b> | <b>0.87</b> | <b>0.71</b> | <b>0.14752</b> |
| <b>S10AC</b> | <b>1</b>  | <b>0.83</b> | <b>0.71</b> | <b>0.1463</b>  |
| <b>HV374</b> | <b>4</b>  | <b>1.16</b> | <b>0.71</b> | <b>0.1463</b>  |
| <b>CAP7</b>  | <b>1</b>  | <b>1.21</b> | <b>0.72</b> | <b>0.14448</b> |
| <b>LEUK</b>  | <b>1</b>  | <b>0.87</b> | <b>0.72</b> | <b>0.14388</b> |
| <b>KCY</b>   | <b>3</b>  | <b>0.89</b> | <b>0.73</b> | <b>0.13966</b> |
| <b>ITIH4</b> | <b>5</b>  | <b>0.97</b> | <b>0.73</b> | <b>0.13847</b> |
| <b>ACINU</b> | <b>1</b>  | <b>1.30</b> | <b>0.73</b> | <b>0.13549</b> |
| <b>RECQ1</b> | <b>1</b>  | <b>0.86</b> | <b>0.73</b> | <b>0.1343</b>  |
| <b>PEDF</b>  | <b>1</b>  | <b>1.23</b> | <b>0.74</b> | <b>0.13312</b> |
| <b>ZC3H4</b> | <b>1</b>  | <b>0.86</b> | <b>0.74</b> | <b>0.13312</b> |

|              |           |             |             |                |
|--------------|-----------|-------------|-------------|----------------|
| <b>KV139</b> | <b>3</b>  | <b>1.32</b> | <b>0.74</b> | <b>0.13312</b> |
| <b>RUVB2</b> | <b>1</b>  | <b>0.85</b> | <b>0.74</b> | <b>0.13194</b> |
| <b>RL14</b>  | <b>1</b>  | <b>0.89</b> | <b>0.74</b> | <b>0.12901</b> |
| <b>GIMA4</b> | <b>1</b>  | <b>1.23</b> | <b>0.75</b> | <b>0.12784</b> |
| <b>THRB</b>  | <b>1</b>  | <b>1.15</b> | <b>0.75</b> | <b>0.12784</b> |
| <b>IGLL5</b> | <b>9</b>  | <b>1.22</b> | <b>0.75</b> | <b>0.12784</b> |
| <b>PRDX3</b> | <b>1</b>  | <b>1.10</b> | <b>0.76</b> | <b>0.12205</b> |
| <b>IGKC</b>  | <b>7</b>  | <b>1.12</b> | <b>0.76</b> | <b>0.11862</b> |
| <b>HV330</b> | <b>4</b>  | <b>1.16</b> | <b>0.76</b> | <b>0.11748</b> |
| <b>RS19</b>  | <b>5</b>  | <b>1.09</b> | <b>0.76</b> | <b>0.11748</b> |
| <b>RL6</b>   | <b>3</b>  | <b>0.90</b> | <b>0.76</b> | <b>0.11691</b> |
| <b>CAN2</b>  | <b>2</b>  | <b>1.09</b> | <b>0.77</b> | <b>0.11634</b> |
| <b>EVL</b>   | <b>3</b>  | <b>1.10</b> | <b>0.77</b> | <b>0.11634</b> |
| <b>TYPH</b>  | <b>11</b> | <b>0.93</b> | <b>0.77</b> | <b>0.11238</b> |
| <b>CLIC4</b> | <b>1</b>  | <b>0.85</b> | <b>0.78</b> | <b>0.10958</b> |
| <b>TRI25</b> | <b>2</b>  | <b>0.91</b> | <b>0.78</b> | <b>0.10846</b> |
| <b>ERAP1</b> | <b>6</b>  | <b>1.17</b> | <b>0.78</b> | <b>0.10846</b> |
| <b>PUR9</b>  | <b>4</b>  | <b>0.94</b> | <b>0.79</b> | <b>0.10237</b> |
| <b>HV349</b> | <b>1</b>  | <b>0.94</b> | <b>0.79</b> | <b>0.10182</b> |
| <b>RL10</b>  | <b>2</b>  | <b>0.92</b> | <b>0.79</b> | <b>0.10182</b> |
| <b>VNN1</b>  | <b>1</b>  | <b>0.93</b> | <b>0.80</b> | <b>0.09854</b> |
| <b>HV551</b> | <b>1</b>  | <b>0.87</b> | <b>0.80</b> | <b>0.098</b>   |
| <b>IPYR</b>  | <b>3</b>  | <b>1.06</b> | <b>0.80</b> | <b>0.09691</b> |
| <b>NCKPL</b> | <b>2</b>  | <b>0.91</b> | <b>0.80</b> | <b>0.09528</b> |
| <b>KV105</b> | <b>1</b>  | <b>1.16</b> | <b>0.80</b> | <b>0.09474</b> |
| <b>BIP</b>   | <b>13</b> | <b>0.94</b> | <b>0.81</b> | <b>0.0942</b>  |
| <b>NAMPT</b> | <b>7</b>  | <b>1.04</b> | <b>0.81</b> | <b>0.08938</b> |
| <b>LAMA1</b> | <b>1</b>  | <b>1.13</b> | <b>0.82</b> | <b>0.0846</b>  |
| <b>VPS4B</b> | <b>2</b>  | <b>1.09</b> | <b>0.82</b> | <b>0.08407</b> |
| <b>MDHM</b>  | <b>2</b>  | <b>0.97</b> | <b>0.82</b> | <b>0.08407</b> |
| <b>IGLC2</b> | <b>3</b>  | <b>1.15</b> | <b>0.83</b> | <b>0.08302</b> |
| <b>TXND5</b> | <b>11</b> | <b>0.94</b> | <b>0.83</b> | <b>0.08249</b> |
| <b>KVD29</b> | <b>2</b>  | <b>1.05</b> | <b>0.83</b> | <b>0.0804</b>  |
| <b>RS24</b>  | <b>1</b>  | <b>0.92</b> | <b>0.83</b> | <b>0.07988</b> |
| <b>CO3</b>   | <b>7</b>  | <b>0.98</b> | <b>0.83</b> | <b>0.07988</b> |
| <b>TIF1B</b> | <b>1</b>  | <b>0.88</b> | <b>0.84</b> | <b>0.07831</b> |
| <b>OAS1</b>  | <b>1</b>  | <b>0.87</b> | <b>0.84</b> | <b>0.07624</b> |
| <b>LSM6</b>  | <b>1</b>  | <b>0.88</b> | <b>0.84</b> | <b>0.07572</b> |
| <b>EFHD2</b> | <b>4</b>  | <b>1.04</b> | <b>0.84</b> | <b>0.07572</b> |
| <b>ERF3B</b> | <b>1</b>  | <b>1.06</b> | <b>0.84</b> | <b>0.0752</b>  |
| <b>STMN1</b> | <b>2</b>  | <b>1.06</b> | <b>0.84</b> | <b>0.07366</b> |
| <b>IGHA2</b> | <b>4</b>  | <b>1.10</b> | <b>0.84</b> | <b>0.07366</b> |
| <b>SNX6</b>  | <b>1</b>  | <b>0.95</b> | <b>0.85</b> | <b>0.07212</b> |
| <b>PPID</b>  | <b>1</b>  | <b>0.92</b> | <b>0.85</b> | <b>0.07212</b> |

|              |           |             |             |                |
|--------------|-----------|-------------|-------------|----------------|
| <b>GANAB</b> | <b>4</b>  | <b>0.95</b> | <b>0.85</b> | <b>0.07109</b> |
| <b>ALBU</b>  | <b>29</b> | <b>0.95</b> | <b>0.85</b> | <b>0.07007</b> |
| <b>COTL1</b> | <b>10</b> | <b>1.04</b> | <b>0.86</b> | <b>0.06803</b> |
| <b>ARHG6</b> | <b>1</b>  | <b>0.93</b> | <b>0.86</b> | <b>0.06753</b> |
| <b>SPB10</b> | <b>1</b>  | <b>0.89</b> | <b>0.86</b> | <b>0.06753</b> |
| <b>RS14</b>  | <b>3</b>  | <b>1.05</b> | <b>0.86</b> | <b>0.06651</b> |
| <b>RS13</b>  | <b>2</b>  | <b>1.06</b> | <b>0.87</b> | <b>0.05948</b> |
| <b>CH10</b>  | <b>1</b>  | <b>1.04</b> | <b>0.87</b> | <b>0.05899</b> |
| <b>AHSA1</b> | <b>1</b>  | <b>0.96</b> | <b>0.87</b> | <b>0.05849</b> |
| <b>RL27A</b> | <b>2</b>  | <b>0.93</b> | <b>0.88</b> | <b>0.0575</b>  |
| <b>ARHG1</b> | <b>1</b>  | <b>0.93</b> | <b>0.89</b> | <b>0.05306</b> |
| <b>HPT</b>   | <b>4</b>  | <b>1.03</b> | <b>0.89</b> | <b>0.05306</b> |
| <b>ROA0</b>  | <b>2</b>  | <b>1.05</b> | <b>0.89</b> | <b>0.05257</b> |
| <b>HXK3</b>  | <b>3</b>  | <b>0.96</b> | <b>0.89</b> | <b>0.05257</b> |
| <b>VASP</b>  | <b>10</b> | <b>0.97</b> | <b>0.89</b> | <b>0.05257</b> |
| <b>S10A8</b> | <b>2</b>  | <b>1.05</b> | <b>0.89</b> | <b>0.05061</b> |
| <b>HEMO</b>  | <b>20</b> | <b>0.99</b> | <b>0.89</b> | <b>0.04964</b> |
| <b>IGHD</b>  | <b>3</b>  | <b>1.12</b> | <b>0.89</b> | <b>0.04915</b> |
| <b>PLD4</b>  | <b>4</b>  | <b>1.04</b> | <b>0.90</b> | <b>0.04769</b> |
| <b>TFG</b>   | <b>1</b>  | <b>0.95</b> | <b>0.90</b> | <b>0.04479</b> |
| <b>BAF</b>   | <b>1</b>  | <b>0.96</b> | <b>0.91</b> | <b>0.04335</b> |
| <b>PPP5</b>  | <b>1</b>  | <b>1.07</b> | <b>0.91</b> | <b>0.04287</b> |
| <b>IGHA1</b> | <b>17</b> | <b>1.03</b> | <b>0.91</b> | <b>0.04239</b> |
| <b>DEF3</b>  | <b>1</b>  | <b>0.96</b> | <b>0.92</b> | <b>0.0381</b>  |
| <b>AL1B1</b> | <b>1</b>  | <b>1.07</b> | <b>0.92</b> | <b>0.03716</b> |
| <b>KAP0</b>  | <b>2</b>  | <b>1.03</b> | <b>0.92</b> | <b>0.03574</b> |
| <b>C1TC</b>  | <b>2</b>  | <b>1.03</b> | <b>0.92</b> | <b>0.03527</b> |
| <b>CD97</b>  | <b>1</b>  | <b>1.09</b> | <b>0.92</b> | <b>0.0348</b>  |
| <b>RL13</b>  | <b>5</b>  | <b>0.97</b> | <b>0.92</b> | <b>0.03433</b> |
| <b>FIBG</b>  | <b>1</b>  | <b>1.02</b> | <b>0.93</b> | <b>0.03245</b> |
| <b>ANXA1</b> | <b>14</b> | <b>0.97</b> | <b>0.93</b> | <b>0.03198</b> |
| <b>RS15A</b> | <b>2</b>  | <b>0.98</b> | <b>0.93</b> | <b>0.02965</b> |
| <b>IGHG4</b> | <b>2</b>  | <b>0.94</b> | <b>0.93</b> | <b>0.02965</b> |
| <b>GNAI2</b> | <b>3</b>  | <b>1.03</b> | <b>0.94</b> | <b>0.02641</b> |
| <b>SNX1</b>  | <b>1</b>  | <b>0.98</b> | <b>0.95</b> | <b>0.02411</b> |
| <b>SHBG</b>  | <b>1</b>  | <b>1.02</b> | <b>0.95</b> | <b>0.02365</b> |
| <b>PSD12</b> | <b>1</b>  | <b>0.98</b> | <b>0.95</b> | <b>0.02182</b> |
| <b>ELNE</b>  | <b>4</b>  | <b>0.97</b> | <b>0.95</b> | <b>0.02182</b> |
| <b>DBNL</b>  | <b>1</b>  | <b>1.02</b> | <b>0.96</b> | <b>0.01728</b> |
| <b>RS9</b>   | <b>1</b>  | <b>0.97</b> | <b>0.96</b> | <b>0.01592</b> |
| <b>MNDA</b>  | <b>7</b>  | <b>1.02</b> | <b>0.96</b> | <b>0.01592</b> |
| <b>PRS6A</b> | <b>1</b>  | <b>1.02</b> | <b>0.97</b> | <b>0.01457</b> |
| <b>APOC3</b> | <b>1</b>  | <b>1.00</b> | <b>0.97</b> | <b>0.01457</b> |
| <b>IGHG1</b> | <b>10</b> | <b>0.98</b> | <b>0.97</b> | <b>0.01412</b> |

|              |           |             |             |                |
|--------------|-----------|-------------|-------------|----------------|
| <b>HV43D</b> | <b>1</b>  | <b>0.99</b> | <b>0.97</b> | <b>0.01323</b> |
| <b>AN32E</b> | <b>2</b>  | <b>0.99</b> | <b>0.97</b> | <b>0.01323</b> |
| <b>PDCD5</b> | <b>1</b>  | <b>1.01</b> | <b>0.98</b> | <b>0.01055</b> |
| <b>AMPL</b>  | <b>14</b> | <b>0.99</b> | <b>0.98</b> | <b>0.01055</b> |
| <b>S10A6</b> | <b>3</b>  | <b>1.00</b> | <b>0.98</b> | <b>0.00745</b> |
| <b>CALR</b>  | <b>6</b>  | <b>0.99</b> | <b>0.98</b> | <b>0.00745</b> |
| <b>HV439</b> | <b>3</b>  | <b>0.99</b> | <b>0.98</b> | <b>0.007</b>   |
| <b>ANXA7</b> | <b>3</b>  | <b>0.99</b> | <b>0.99</b> | <b>0.00656</b> |
| <b>RAC2</b>  | <b>3</b>  | <b>1.00</b> | <b>0.99</b> | <b>0.00612</b> |
| <b>PRTN3</b> | <b>3</b>  | <b>0.99</b> | <b>0.99</b> | <b>0.00612</b> |
| <b>HV601</b> | <b>1</b>  | <b>1.01</b> | <b>0.99</b> | <b>0.00568</b> |
| <b>RL26</b>  | <b>2</b>  | <b>1.01</b> | <b>0.99</b> | <b>0.00524</b> |
| <b>RS27L</b> | <b>2</b>  | <b>1.01</b> | <b>0.99</b> | <b>0.00524</b> |
| <b>ROA3</b>  | <b>5</b>  | <b>1.00</b> | <b>0.99</b> | <b>0.00524</b> |
| <b>TBA1B</b> | <b>3</b>  | <b>1.00</b> | <b>0.99</b> | <b>0.0048</b>  |
| <b>FRIH</b>  | <b>4</b>  | <b>1.00</b> | <b>0.99</b> | <b>0.00349</b> |
| <b>PERM</b>  | <b>18</b> | <b>1.00</b> | <b>1.00</b> | <b>0.00218</b> |

Table S2: Cell input and sequencing output of the scRNA-seq experiment.

| Subject                          | <i>Ex vivo</i> | Flu 6hrs                 | Flu 24hrs |
|----------------------------------|----------------|--------------------------|-----------|
| A                                | 2759           | 2102                     | 1871      |
| B                                | 2794           | 2758                     | 2796      |
| C                                | 2535           | 2450                     | 2206      |
| <b>Total Cells per Condition</b> |                |                          |           |
|                                  | 8088           | 7310                     | 6873      |
| <b>Mean reads per cell</b>       |                |                          |           |
|                                  | 55,375         | 58,215                   | 62,944    |
| <b>Median genes per cell</b>     |                |                          |           |
|                                  | 2,670          | 2,786                    | 3,758     |
| <b>Doublets</b>                  |                |                          |           |
|                                  | 2152           | (excluded from analysis) |           |
| <b>Ambiguous</b>                 |                |                          |           |
|                                  | 151            | (excluded from analysis) |           |



Table S3: Top 25 enriched genes in the pDC scRNA-seq clusters, by cluster

| Gene             | avg_logFC | p_val_adj |
|------------------|-----------|-----------|
| <b>CLUSTER 0</b> |           |           |
| FCER1G           | 2.1024666 | 0         |
| C12orf75         | 2.0461347 | 0         |
| MS4A6A           | 1.7763833 | 0         |
| PTPRE            | 1.6217105 | 0         |
| TAGLN2           | 1.5492633 | 0         |
| ALOX5AP          | 1.5456969 | 0         |
| UCP2             | 1.5376786 | 0         |
| RNASE6           | 1.5040914 | 0         |
| ZFP36L2          | 1.4492112 | 0         |
| CST3             | 1.4329711 | 0         |
| DERL3            | 1.430853  | 0         |
| PLD4             | 1.3906609 | 0         |
| PPP1R14B         | 1.3824086 | 0         |
| GZMB             | 1.3781429 | 0         |
| UGCG             | 1.3781111 | 0         |
| TPM2             | 1.3715611 | 0         |
| CORO1A           | 1.3562062 | 0         |
| CCDC50           | 1.3482743 | 0         |
| APP              | 1.3357869 | 0         |
| SERPINF1         | 1.3109063 | 0         |
| SAMHD1           | 1.2736115 | 0         |
| IRF2BP2          | 1.2652994 | 0         |
| BCL11A           | 1.2436351 | 0         |
| GAPT             | 1.2419787 | 0         |

| Gene             | avg_logFC | p_val_adj |
|------------------|-----------|-----------|
| <b>CLUSTER 1</b> |           |           |
| IFNA2            | 3.549002  | 0         |
| IFNA14           | 3.36561   | 0         |
| IFNA6            | 3.331724  | 0         |
| IFNB1            | 3.189481  | 0         |
| IFNW1            | 3.158891  | 0         |
| IFNA17           | 3.157789  | 0         |
| IFNA10           | 3.105879  | 0         |
| IFNA8            | 3.069484  | 0         |
| IFNA5            | 3.052137  | 0         |
| IFNA4            | 2.975805  | 0         |
| IFNA21           | 2.94575   | 0         |
| IFNA1            | 2.645179  | 0         |
| IFNA16           | 2.627565  | 0         |
| IFNA7            | 2.594752  | 0         |
| IFNL1            | 2.532747  | 0         |
| PPP1R15A         | 2.506891  | 0         |
| PUS10            | 2.17797   | 0         |
| IL12A            | 2.163395  | 0         |
| CCL3             | 2.132322  | 0         |
| CCL4L2           | 2.089998  | 0         |
| BCL2A1           | 2.05844   | 0         |
| CCL4             | 2.050363  | 0         |
| TNF              | 1.927204  | 0         |
| NR4A3            | 1.847532  | 0         |

| Gene             | avg_logFC | p_val_adj |
|------------------|-----------|-----------|
| <b>CLUSTER 2</b> |           |           |
| CCL4             | 1.702038  | 0         |
| NCF1             | 1.598255  | 0         |
| CCL4L2           | 1.555877  | 0         |
| TNF              | 1.550849  | 0         |
| NABP1            | 1.539063  | 0         |
| HSPA1A           | 1.527175  | 0         |
| CD83             | 1.503993  | 0         |
| LTB              | 1.499888  | 0         |
| HSPA1B           | 1.280324  | 0         |
| IFIT2            | 1.265776  | 0         |
| CCL3             | 1.229196  | 0         |
| CDKN1A           | 1.226971  | 0         |
| LTA              | 1.207946  | 0         |
| CD40             | 1.157032  | 0         |
| LDLRAD4          | 1.143193  | 0         |
| HSP90AA1         | 1.099246  | 0         |
| CCND2            | 1.086032  | 0         |
| TYW3             | 1.013196  | 0         |
| RGS1             | 1.003052  | 5.5E-284  |
| PPP1R15A         | 0.996728  | 0         |
| CALCRL           | 0.986798  | 5.6E-192  |
| ATF3             | 0.967541  | 1.5E-222  |
| HSPA8            | 0.92811   | 0         |
| CCL3L1           | 0.924779  | 1.5E-108  |

| Gene             | avg_logFC | p_val_adj |
|------------------|-----------|-----------|
| <b>CLUSTER 3</b> |           |           |
| IFI27            | 1.774985  | 0         |
| PNOC             | 1.45832   | 5.1E-236  |
| TNFSF10          | 1.341827  | 0         |
| NEAT1            | 1.303959  | 0         |
| IFI6             | 1.268901  | 0         |
| CXCL13           | 1.261145  | 3.4E-165  |
| FTL              | 1.205017  | 0         |
| DUSP5            | 1.184991  | 0         |
| CLEC2D           | 1.167247  | 0         |
| HIST1H1C         | 1.135166  | 0         |
| GAPDH            | 1.131192  | 0         |
| ATOX1            | 1.07544   | 0         |
| LY6E             | 1.022173  | 0         |
| ISG15            | 1.007866  | 0         |
| CD38             | 0.953347  | 0         |
| SCT              | 0.948665  | 1.4E-102  |
| STAT1            | 0.940203  | 0         |
| COX5A            | 0.911369  | 0         |
| PRDM1            | 0.8714    | 0         |
| CASP3            | 0.869088  | 0         |
| RSAD2            | 0.846212  | 0         |
| SAT1             | 0.824952  | 1.9E-293  |
| P2RY10           | 0.80955   | 0         |
| TRIB1            | 0.804212  | 0         |

| Gene             | avg_logFC | p_val_adj |
|------------------|-----------|-----------|
| <b>CLUSTER 4</b> |           |           |
| CD44             | 1.59138   | 0         |
| CXCL10           | 1.428058  | 0         |
| NMB              | 1.424394  | 1.79E-88  |
| LTA              | 1.221621  | 0         |
| CXCL11           | 1.20654   | 5.9E-127  |
| CD40             | 1.09721   | 0         |
| CCL4L2           | 1.073064  | 0         |
| SLAMF7           | 1.063316  | 0         |
| ID2              | 1.058091  | 0         |
| CD83             | 1.049015  | 0         |
| CALCRL           | 1.02762   | 0         |
| FAM129A          | 1.025988  | 0         |
| HSPA1A           | 1.025384  | 0         |
| ALCAM            | 1.018413  | 0         |
| REL              | 1.003306  | 2.5E-303  |
| BCL2A1           | 0.999812  | 0         |
| MIR155HG         | 0.986837  | 0         |
| TFEC             | 0.926733  | 0         |
| CFLAR            | 0.89305   | 0         |
| BCL2L1           | 0.891324  | 0         |
| CCL4             | 0.881024  | 0         |
| NFKB1            | 0.859435  | 0         |
| HERC5            | 0.85307   | 0         |
| C15orf48         | 0.843186  | 1.7E-233  |

| Gene             | avg_logFC | p_val_adj |
|------------------|-----------|-----------|
| <b>CLUSTER 5</b> |           |           |
| CXCL13           | 1.800695  | 0         |
| CCR7             | 1.710081  | 0         |
| TMSB4X           | 1.693879  | 0         |
| TUBA1A           | 1.626864  | 0         |
| SOX4             | 1.622532  | 0         |
| BASP1            | 1.596734  | 0         |
| FSCN1            | 1.446334  | 0         |
| ZFP36L1          | 1.398223  | 0         |
| CD70             | 1.386201  | 0         |
| IFI27            | 1.374846  | 0         |
| LMNB1            | 1.326046  | 0         |
| MARCKS           | 1.299956  | 0         |
| IFITM3           | 1.277995  | 0         |
| CKB              | 1.273303  | 0         |
| LY6E             | 1.206548  | 0         |
| GAPDH            | 1.191684  | 0         |
| TUBB             | 1.163445  | 0         |
| SERPINB1         | 1.158247  | 0         |
| RAB9A            | 1.135876  | 0         |
| S100A11          | 1.119249  | 0         |
| PKM              | 1.11292   | 0         |
| CLEC2D           | 1.112227  | 0         |
| BID              | 1.1038    | 0         |
| TNFSF4           | 1.0764    | 0         |

| Gene             | avg_logFC | p_val_adj |
|------------------|-----------|-----------|
| <b>CLUSTER 6</b> |           |           |
| MT2A             | 1.32218   | 0         |
| EAF2             | 1.144386  | 0         |
| GAPDH            | 1.141306  | 0         |
| TPI1             | 1.079615  | 0         |
| CCR7             | 1.077027  | 0         |
| NEAT1            | 1.016605  | 0         |
| LDHA             | 0.976995  | 0         |
| CLEC2D           | 0.951816  | 0         |
| HIST1H1C         | 0.939304  | 0         |
| CLEC2B           | 0.921002  | 0         |
| MPC2             | 0.910105  | 0         |
| TALDO1           | 0.907717  | 0         |
| GBP1             | 0.902111  | 0         |
| UCHL1            | 0.899496  | 0         |
| SPATS2L          | 0.898494  | 0         |
| CSRP2            | 0.898457  | 0         |
| CMTM7            | 0.880067  | 0         |
| PKM              | 0.879726  | 0         |
| IFIT1            | 0.865848  | 0         |
| IFI27            | 0.845355  | 0         |
| CTSC             | 0.844856  | 4.2E-275  |
| PRDX1            | 0.841203  | 0         |
| FTL              | 0.839755  | 0         |
| TYMP             | 0.829577  | 0         |

| Gene             | avg_logFC | p_val_adj |
|------------------|-----------|-----------|
| <b>CLUSTER 7</b> |           |           |
| LTB              | 1.369874  | 0         |
| TYW3             | 1.01182   | 0         |
| HSPA1A           | 0.995985  | 0         |
| BTG1             | 0.91905   | 0         |
| HSPA8            | 0.870512  | 0         |
| BBX              | 0.860342  | 0         |
| LAP3             | 0.833926  | 0         |
| DCPS             | 0.802439  | 2.1E-250  |
| CSF2RB           | 0.795061  | 3.1E-300  |
| PAG1             | 0.779625  | 0         |
| HSP90AA1         | 0.77947   | 0         |
| SMC6             | 0.772563  | 0         |
| FYB1             | 0.769351  | 1.7E-303  |
| SLC12A2          | 0.768546  | 5.4E-266  |
| EIF2AK2          | 0.762227  | 0         |
| SERPING1         | 0.759044  | 0         |
| CRYZ             | 0.751272  | 0         |
| TSPAN13          | 0.745545  | 0         |
| TCL1A            | 0.738809  | 4.82E-61  |
| UBE2L6           | 0.738395  | 0         |
| PIM3             | 0.734997  | 0         |
| SAMD9            | 0.730834  | 0         |
| DDX60            | 0.725135  | 0         |
| DNASE1L3         | 0.721615  | 0         |

| Gene             | avg_logFC | p_val_adj |
|------------------|-----------|-----------|
| <b>CLUSTER 8</b> |           |           |
| CCND2            | 1.643757  | 0         |
| KHK              | 1.294032  | 7.8E-208  |
| CCL19            | 1.163064  | 2.12E-94  |
| MYBL2            | 1.13259   | 0         |
| BTG1             | 1.108356  | 0         |
| ERICH3           | 0.859103  | 5.5E-185  |
| TCL1A            | 0.827502  | 3.87E-95  |
| CALR             | 0.774469  | 0         |
| NLRP7            | 0.764753  | 0         |
| NKG7             | 0.731817  | 5.4E-129  |
| SYNGR2           | 0.716912  | 1.2E-235  |
| IFI27            | 0.712686  | 2.3E-159  |
| CTSZ             | 0.699129  | 7.1E-223  |
| GPX4             | 0.699015  | 2.3E-254  |
| HSP90B1          | 0.692583  | 1.1E-255  |
| WNT10A           | 0.688987  | 5.9E-284  |
| TXN              | 0.686913  | 2.3E-146  |
| PNOC             | 0.64691   | 9.77E-46  |
| COX5A            | 0.646351  | 3.3E-268  |
| SCT              | 0.643599  | 8.3E-114  |
| VOPP1            | 0.626633  | 1.4E-234  |
| BTG2             | 0.621961  | 3.7E-132  |
| P2RY6            | 0.616117  | 6.4E-221  |
| IGHM             | 0.61362   | 2.1E-278  |

| Gene             | avg_logFC | p_val_adj |
|------------------|-----------|-----------|
| <b>CLUSTER 9</b> |           |           |
| CXCL11           | 1.83922   | 2.1E-253  |
| RSAD2            | 1.697238  | 3.1E-295  |
| CXCL10           | 1.634519  | 1.1E-204  |
| HSPA1A           | 1.127474  | 1.9E-192  |
| BTG1             | 1.092461  | 1.5E-159  |
| HMOX1            | 1.081575  | 1.58E-61  |
| PARP14           | 1.023822  | 2.5E-245  |
| TFEC             | 1.014234  | 1.3E-215  |
| AKR1C3           | 0.996355  | 2.2E-153  |
| EMP3             | 0.990186  | 1.9E-197  |
| ENDOG            | 0.962219  | 3.93E-94  |
| CSF2RB           | 0.949516  | 2.4E-141  |
| RNF213           | 0.916677  | 1.2E-224  |
| HSPA1B           | 0.894641  | 1E-132    |
| OAS3             | 0.883837  | 2.9E-206  |
| HMGCS1           | 0.883055  | 2E-128    |
| CXorf21          | 0.87998   | 2.25E-81  |
| SQSTM1           | 0.830337  | 1.4E-103  |
| MX1              | 0.810703  | 9.9E-192  |
| PIM3             | 0.808803  | 3.3E-166  |
| CMPK2            | 0.801006  | 3.9E-189  |
| LAP3             | 0.798204  | 2.1E-202  |
| DENND1B          | 0.794405  | 6.4E-187  |
| CXCL9            | 0.794203  | 1.8E-75   |

| Gene              | avg_logFC | p_val_adj |
|-------------------|-----------|-----------|
| <b>CLUSTER 10</b> |           |           |
| MALAT1            | 1.213465  | 2.18E-65  |
| XIST              | 0.930008  | 3.13E-83  |
| NEAT1             | 0.816518  | 4.92E-39  |
| N4BP2L2           | 0.689664  | 3.67E-62  |
| MT-ND5            | 0.657111  | 8.48E-56  |
| POLR2J3.1         | 0.648099  | 6.96E-39  |
| CHD9              | 0.622404  | 3.93E-35  |
| DDX17             | 0.613559  | 4.82E-50  |
| MT-CO1            | 0.580231  | 7.42E-23  |
| PNISR             | 0.579236  | 5.13E-43  |
| HNRNPH1           | 0.566843  | 8.18E-44  |
| MT-ND2            | 0.55709   | 1.23E-51  |
| ARID1B            | 0.551148  | 1.61E-37  |
| ANKRD12           | 0.545767  | 1.94E-39  |
| RSRP1             | 0.543745  | 1.48E-35  |
| FTX               | 0.541207  | 2.98E-36  |
| RBM39             | 0.532532  | 1.34E-39  |
| PNN               | 0.525924  | 5.7E-32   |
| RNF213            | 0.522187  | 8.38E-23  |
| ZNF207            | 0.521197  | 1.74E-37  |
| CCNL1             | 0.519185  | 7.36E-32  |
| INTS6             | 0.518957  | 4.69E-43  |
| ZEB2              | 0.517619  | 7.99E-31  |
| CCDC88A           | 0.510893  | 1.71E-35  |

| Gene              | avg_logFC | p_val_adj |
|-------------------|-----------|-----------|
| <b>CLUSTER 11</b> |           |           |
| IFNA1             | 3.23627   | 4.3E-270  |
| IFNA16            | 3.209599  | 3.2E-243  |
| CYTOR             | 3.129515  | 4.2E-286  |
| IFNA4             | 2.93449   | 1.8E-241  |
| IFNA21            | 2.841742  | 1.1E-259  |
| IFNL1             | 2.831011  | 7E-175    |
| IFNA8             | 2.686882  | 1.4E-227  |
| IFNA17            | 2.634333  | 9.1E-205  |
| IFNA5             | 2.622508  | 6.6E-286  |
| MIR4435-2HG       | 2.60344   | 0         |
| CCL5              | 2.537599  | 1.1E-156  |
| IFNW1             | 2.459461  | 3E-239    |
| IFNB1             | 2.435702  | 2.8E-228  |
| IFNA10            | 2.431466  | 2.5E-222  |
| GPR34             | 2.346484  | 0         |
| IFNA6             | 2.338089  | 4.1E-118  |
| DKK1              | 2.331726  | 0         |
| CXCL8             | 2.218949  | 1.8E-295  |
| IFNA14            | 2.205407  | 2.6E-209  |
| IFNA7             | 2.200717  | 0         |
| IFNE              | 2.190019  | 0         |
| CCL3L1            | 2.161842  | 2.3E-186  |
| BET1              | 2.15487   | 5.1E-254  |
| CCL3              | 2.075043  | 4.2E-173  |

| Gene              | avg_logFC | p_val_adj |
|-------------------|-----------|-----------|
| <b>CLUSTER 12</b> |           |           |
| TMEM267           | 1.622947  | 7.6E-122  |
| CTSC              | 1.412497  | 7.8E-144  |
| DUSP11            | 1.365048  | 9.2E-156  |
| IL12A             | 1.318169  | 1.9E-135  |
| GRSF1             | 1.187564  | 1.2E-157  |
| PNOC              | 1.167879  | 1.3E-42   |
| CCR7              | 1.152894  | 2.5E-126  |
| RGS1              | 1.14512   | 7.33E-48  |
| IFI27             | 1.137594  | 1.1E-107  |
| IGFBP4            | 1.092764  | 1.2E-146  |
| HARS              | 1.083338  | 3.1E-105  |
| MPC2              | 1.05995   | 6.7E-112  |
| CMTM7             | 1.050202  | 1.4E-139  |
| CLECL1            | 1.034513  | 1.6E-121  |
| CAB39L            | 1.028687  | 1.8E-197  |
| MARCKSL1          | 1.024607  | 1.8E-80   |
| RNF115            | 1.019902  | 7.58E-82  |
| GPR34             | 0.960441  | 9.67E-57  |
| CD48              | 0.943073  | 1.59E-40  |
| GPR160            | 0.934233  | 2.3E-174  |
| CLEC2D            | 0.919263  | 7.5E-106  |
| REL               | 0.917475  | 2E-110    |
| CRYBG1            | 0.900703  | 2.1E-206  |
| ENPP2             | 0.898065  | 1.41E-87  |

| Gene              | avg_logFC | p_val_adj |
|-------------------|-----------|-----------|
| <b>CLUSTER 13</b> |           |           |
| IGHA1             | 6.122379  | 2.6E-143  |
| IGLC3             | 4.976468  | 1         |
| IGKC              | 4.781452  | 1.06E-07  |
| IGHG2             | 4.599817  | 7.8E-281  |
| IGLC2             | 4.517642  | 1         |
| IGHG4             | 4.310132  | 6.6E-148  |
| IGHG1             | 4.141818  | 2.1E-167  |
| IGLC7             | 4.047892  | 4.12E-33  |
| IGHA2             | 3.653254  | 0         |
| IGHM              | 3.340308  | 0.000234  |
| IGHG3             | 3.121733  | 0         |
| JCHAIN            | 2.643538  | 6.5E-102  |
| CD79A             | 2.092111  | 0         |
| IGLL5             | 1.981569  | 1.8E-283  |
| CD27              | 1.936166  | 0         |
| TNFRSF17          | 1.820993  | 3.1E-174  |
| POU2AF1           | 1.777515  | 0         |
| MZB1              | 1.743814  | 2.23E-98  |
| FKBP11            | 1.612301  | 6.2E-152  |
| KLF2              | 1.533383  | 0         |
| TENT5C            | 1.450866  | 0         |
| IGKV4-1           | 1.360235  | 0         |
| PIM2              | 1.184434  | 1E-108    |
| CD52              | 1.177831  | 3.4E-82   |

| Gene              | avg_logFC | p_val_adj |
|-------------------|-----------|-----------|
| <b>CLUSTER 14</b> |           |           |
| CCND2             | 1.673926  | 7.29E-63  |
| PNOC              | 1.511161  | 2.7E-20   |
| PCLAF             | 1.30334   | 0         |
| TYMS              | 1.298088  | 0         |
| PCNA              | 1.036432  | 5.1E-85   |
| IFI27             | 0.984043  | 8.59E-26  |
| CLSPN             | 0.973058  | 0         |
| MCM4              | 0.956267  | 0         |
| CEP55             | 0.922884  | 2.16E-97  |
| NASP              | 0.870973  | 7.03E-52  |
| GAPDH             | 0.867348  | 6.01E-34  |
| GINS2             | 0.862674  | 0         |
| CKS1B             | 0.852369  | 1.79E-49  |
| EDNRB             | 0.845541  | 4.69E-40  |
| SCT               | 0.840879  | 2.31E-13  |
| CTSC              | 0.829415  | 8.46E-18  |
| MCM7              | 0.811443  | 3E-107    |
| CHEK1             | 0.807757  | 0         |
| CLECL1            | 0.802669  | 4.91E-28  |
| H2AFZ             | 0.802205  | 5.25E-33  |
| IGHM              | 0.793891  | 2.11E-34  |
| MCM3              | 0.789192  | 6.32E-61  |
| COX5A             | 0.781364  | 8.36E-40  |
| TUBA1B            | 0.781008  | 8.57E-40  |

| Gene              | avg_logFC | p_val_adj |
|-------------------|-----------|-----------|
| <b>CLUSTER 15</b> |           |           |
| PLCG2             | 4.288975  | 8.08E-58  |
| HEXIM1            | 2.578878  | 1.11E-60  |
| JUN               | 2.402232  | 4.64E-42  |
| GADD45B           | 2.249662  | 1.04E-45  |
| IER3              | 2.245483  | 1.09E-27  |
| NFKBIA            | 2.214461  | 7.69E-24  |
| SNHG12            | 2.176202  | 2.27E-83  |
| INTS6             | 2.146815  | 1.84E-36  |
| IER5              | 2.109135  | 8.03E-45  |
| RASD1             | 2.051184  | 4.96E-67  |
| IER2              | 1.985599  | 1.69E-29  |
| MAFB              | 1.953123  | 0         |
| FOS               | 1.934448  | 3.7E-144  |
| SRSF7             | 1.919737  | 4.55E-39  |
| PMAIP1            | 1.84026   | 6.3E-29   |
| SOCS1             | 1.80901   | 2.87E-43  |
| EGR1              | 1.769766  | 4.5E-264  |
| ID2               | 1.763281  | 3.44E-36  |
| PLK2              | 1.762039  | 2.1E-301  |
| DNAJB1            | 1.74626   | 1.44E-05  |
| TUBB4B            | 1.724608  | 1.26E-27  |
| JUNB              | 1.68239   | 5.9E-39   |
| CXCL8             | 1.644674  | 0.524263  |
| HSPA1B            | 1.624778  | 3.9E-31   |



| Gene              | avg_logFC | p_val_adj |
|-------------------|-----------|-----------|
| <b>CLUSTER 16</b> |           |           |
| GIMAP7            | 1.851219  | 0         |
| IL7R              | 1.678736  | 1.7E-105  |
| TRBC2             | 1.656116  | 0         |
| GZMK              | 1.640609  | 0         |
| CD79A             | 1.640104  | 5.53E-14  |
| IGLC3             | 1.604881  | 1         |
| GIMAP4            | 1.549939  | 0         |
| MT2A              | 1.48322   | 7.18E-14  |
| EVL               | 1.457164  | 5.3E-103  |
| LIMD2             | 1.346851  | 7.97E-26  |
| KLF2              | 1.333666  | 2.7E-184  |
| IL32              | 1.263929  | 0         |
| TRAC              | 1.210002  | 0         |
| TRBC1             | 1.201439  | 0         |
| CD52              | 1.186019  | 5.96E-22  |
| CXCR4             | 1.185677  | 2.12E-08  |
| AC245297.3        | 1.154835  | 1.72E-48  |
| ITM2B             | 1.146894  | 4.57E-30  |
| CD3D              | 1.11465   | 0         |
| TRDC              | 1.091593  | 1.2E-119  |
| GBP1              | 1.084558  | 1.07E-25  |
| CD48              | 1.049761  | 1.29E-24  |
| GBP4              | 1.045723  | 3.16E-19  |
| SMCHD1            | 1.031087  | 4.5E-18   |

| Gene              | avg_logFC | p_val_adj |
|-------------------|-----------|-----------|
| <b>CLUSTER 17</b> |           |           |
| LYZ               | 3.203738  | 0         |
| S100A10           | 2.288291  | 5.96E-20  |
| S100A4            | 2.078156  | 9.89E-17  |
| COTL1             | 1.854883  | 1.88E-53  |
| CST3              | 1.586403  | 2.32E-15  |
| PPP1R14A          | 1.262968  | 9.48E-31  |
| FOS               | 1.190144  | 7.8E-125  |
| FGL2              | 1.179553  | 1.1E-104  |
| AXL               | 1.130974  | 3.69E-93  |
| AIF1              | 1.109946  | 1.34E-13  |
| ITGB2             | 1.085394  | 3.83E-20  |
| FCGRT             | 1.077133  | 3.17E-14  |
| CORO1A            | 1.076163  | 6.27E-12  |
| ANXA1             | 1.025688  | 3.08E-42  |
| TXNIP             | 1.021241  | 4.54E-10  |
| VIM               | 1.016814  | 1.78E-08  |
| OTULINL           | 0.992976  | 6.86E-19  |
| SAMHD1            | 0.974915  | 1.7E-10   |
| ACTG1             | 0.964491  | 8.87E-09  |
| S100A6            | 0.951039  | 5.65E-10  |
| DAB2              | 0.909922  | 8.88E-13  |
| CCND3             | 0.885548  | 4.27E-07  |
| LIMD2             | 0.877811  | 6.07E-11  |
| CTSH              | 0.87696   | 6.38E-10  |

Table S4: GaP Subject Demographics

| Subject ID | Age | Sex:   | BMI:  | Medical Conditions (self-reported)                                            | Ethnicity |
|------------|-----|--------|-------|-------------------------------------------------------------------------------|-----------|
| 74178      | 35  | Female | 22.04 | Drug Allergies, Wears Glasses                                                 | Caucasian |
| 74315      | 34  | Female | 27.43 | Asthma, Seasonal Allergies, Urinary Tract Infections (UTI)                    | Caucasian |
| 76746      | 27  | Female | 20.25 | Asthma, Gastroesophageal Reflux Disease (GERD), Wears Glasses, Celiac Disease | Caucasian |
